# Supplementary material
Source: publisher figshare collection journal article supplement (https://acs.figshare.com/ndownloader/files/7440052)
Supplement: Supplementary file 1 [file 7440052]

# Supporting Information

## **Biosynthesis of the Antibiotic Nematophin and its Elongated Derivatives in Entomopathogenic Bacteria**

Xiaofeng Cai,<sup>†</sup> Victoria L. Challinor,<sup>†</sup> Lei Zhao,<sup>†</sup> Daniela Reimer,<sup>†</sup> Hélène Adihou,<sup>†</sup> Peter Grün,<sup>†</sup> Marcel Kaiser,<sup>‡,§</sup> and Helge B. Bode<sup>\*,†,¶</sup>

<sup>†</sup>Merck endowed chair for Molecular Biosciences, Faculty of Biological Sciences, Goethe University Frankfurt, Frankfurt am Main 60438, Germany

<sup>‡</sup>Swiss Tropical and Public Health Institute, Parasite Chemotherapy, Basel 4051, Switzerland

<sup>§</sup>University of Basel, Petersplatz 1, 4003 Basel, Switzerland

<sup>¶</sup>Buchmann Institute for Molecular Life Sciences (BMLS), Goethe University Frankfurt, Frankfurt am Main 60438, Germany

## Table of Contents

|                                                                                                                                          |     |
|------------------------------------------------------------------------------------------------------------------------------------------|-----|
| <b>Experimental procedures</b> .....                                                                                                     | S4  |
| Bacterial strains and culture conditions .....                                                                                           | S4  |
| DNA manipulations.....                                                                                                                   | S4  |
| Construction of <i>E. coli</i> strains for heterologous production of nematophin and nevaltophins .....                                  | S4  |
| Point mutations on PCP domains of RdpD and Pb62A .....                                                                                   | S5  |
| Heterologous production of compounds in <i>E. coli</i> .....                                                                             | S5  |
| Culture extraction and LC-MS analysis of crude extracts from heterologous producers .....                                                | S5  |
| Preliminary structure elucidation of nevaltophins via isotope labelling experiments.....                                                 | S6  |
| Isolation of nevaltophin A (5) .....                                                                                                     | S6  |
| Activity testing against <i>Micrococcus luteus</i> .....                                                                                 | S7  |
| Antiparasite and cytotoxicity assay.....                                                                                                 | S7  |
| <i>In vitro</i> prophenoloxidase (proPO) activation assay .....                                                                          | S7  |
| Phylogenetic analysis of C <sub>term</sub> domains and MT domains.....                                                                   | S7  |
| General chemical methods.....                                                                                                            | S8  |
| Advanced Marfey's Analysis.....                                                                                                          | S15 |
| Quantification of production titer.....                                                                                                  | S15 |
| <b>Supplementary Tables</b> .....                                                                                                        | S17 |
| <b>Table S1.</b> HR-Masses and chemical formula of compounds in this study....                                                           | S17 |
| <b>Table S2.</b> Bioactivity assay of compounds against selected tropical pathogens .....                                                | S17 |
| <b>Table S3.</b> A domain specificity-conferring codes .....                                                                             | S18 |
| <b>Table S4.</b> Bacterial strains used in this study.....                                                                               | S18 |
| <b>Table S5.</b> Primers used in this study.....                                                                                         | S19 |
| <b>Table S6.</b> Plasmids used in this study .....                                                                                       | S20 |
| <b>Supplementary Figures</b> .....                                                                                                       | S21 |
| <b>Figure S1.</b> Construction of RdpABCD and analysis of RdpD-PCP mutation. ....                                                        | S21 |
| <b>Figure S2.</b> LC-MS/MS fragmentations of compounds <b>1-4</b> . ....                                                                 | S22 |
| <b>Figure S3.</b> Comparision of production of compounds <b>1-10</b> in wild type (WT) strains and heterologous expression strains. .... | S23 |
| <b>Figure S4.</b> Chemical structures of selected rhabdopeptides from <i>X. nematophila</i> . <sup>3</sup> .....                         | S24 |

|                                                                                                                                                                                                                             |     |
|-----------------------------------------------------------------------------------------------------------------------------------------------------------------------------------------------------------------------------|-----|
| <b>Figure S5.</b> RdpD-C <sub>term</sub> represents a distinct subclade in the phylogenetic tree of C <sub>term</sub> domains from selected RXP-NRPSs in different <i>Xenorhabdus</i> and <i>Photorhabdus</i> strains. .... | S25 |
| <b>Figure S6.</b> LC-MS/MS fragmentation of nevaltophins A-F ( <b>5-10</b> ). ....                                                                                                                                          | S26 |
| <b>Figure S7.</b> EICs of LC-MS analysis of crude extracts from isotope labeling experiments for determination of compounds <b>5-7</b> . ....                                                                               | S29 |
| <b>Figure S8.</b> <sup>1</sup> H NMR spectrum of <b>5</b> (CDCl <sub>3</sub> , 500 MHz). ....                                                                                                                               | S30 |
| <b>Figure S9.</b> <sup>13</sup> C NMR spectrum of <b>5</b> (CDCl <sub>3</sub> , 125 MHz). ....                                                                                                                              | S30 |
| <b>Figure S10.</b> COSY spectrum of <b>5</b> (CDCl <sub>3</sub> , 500 MHz). ....                                                                                                                                            | S31 |
| <b>Figure S11.</b> HSQC spectrum of <b>5</b> (CDCl <sub>3</sub> , 500 MHz). ....                                                                                                                                            | S31 |
| <b>Figure S12.</b> HMBC spectrum of <b>5</b> (CDCl <sub>3</sub> , 500 MHz). ....                                                                                                                                            | S32 |
| <b>Figure S13.</b> <sup>1</sup> H NMR spectrum of synthetic <b>5</b> (CDCl <sub>3</sub> , 500 MHz). ....                                                                                                                    | S33 |
| <b>Figure S14.</b> <sup>13</sup> C NMR spectrum of synthetic <b>5</b> (CDCl <sub>3</sub> , 125 MHz). ....                                                                                                                   | S33 |
| <b>Figure S15.</b> <sup>1</sup> H NMR spectrum of synthetic <b>8</b> (CDCl <sub>3</sub> , 400 MHz). ....                                                                                                                    | S34 |
| <b>Figure S16.</b> <sup>13</sup> C NMR spectrum of synthetic <b>8</b> (CDCl <sub>3</sub> , 125 MHz). ....                                                                                                                   | S34 |
| <b>Figure S17.</b> Determination of amino acid absolute configuration via the advanced Marfey's method. ....                                                                                                                | S35 |
| <b>Figure S18.</b> EICs of compounds <b>5</b> , <b>6</b> , <b>8</b> and <b>9</b> produced in wild type strain <i>Xenorhabdus</i> PB62.4. ....                                                                               | S36 |
| <b>Figure S19.</b> Comparative analysis of Pb62A-MT domain to the other RXP-NRPS-MT domains. ....                                                                                                                           | S37 |
| <b>Figure S20.</b> Comparison of BPCs from HR-EIS-HPLC-MS analysis for coexpressions of pCX34 (Pb62A) and pCX35 (Pb62B) (black) as well as pCX68 ....                                                                       | S38 |
| <b>Figure S21.</b> HR-EIS-HPLC-MS analysis for coexpression of Pb62A and XndB after feeding with PEA and TRA, respectively as well as expression of empty plasmids as a negative control. ....                              | S39 |
| <b>Figure S22.</b> <sup>1</sup> H NMR spectrum of synthetic <b>12</b> (CDCl <sub>3</sub> , 500 MHz). ....                                                                                                                   | S40 |
| <b>Figure S23.</b> <sup>13</sup> C NMR spectrum of synthetic <b>12</b> (CDCl <sub>3</sub> , 125 MHz). ....                                                                                                                  | S40 |
| <b>Figure S24.</b> <sup>1</sup> H NMR spectrum of synthetic <b>13</b> (CDCl <sub>3</sub> , 500 MHz). ....                                                                                                                   | S41 |
| <b>Figure S25.</b> <sup>13</sup> C NMR spectrum of synthetic <b>13</b> (CDCl <sub>3</sub> , 125 MHz). ....                                                                                                                  | S41 |
| <b>Figure S26.</b> <sup>1</sup> H NMR spectrum of synthetic <b>14</b> (CDCl <sub>3</sub> , 300 MHz). ....                                                                                                                   | S42 |
| <b>Figure S27.</b> <sup>13</sup> C NMR spectrum of synthetic <b>14</b> (CDCl <sub>3</sub> , 75 MHz). ....                                                                                                                   | S42 |
| <b>Figure S28.</b> <sup>1</sup> H NMR spectrum of synthetic <b>15</b> (CDCl <sub>3</sub> , 300 MHz). ....                                                                                                                   | S43 |
| <b>Figure S29.</b> <sup>13</sup> C NMR spectrum of synthetic <b>15</b> (CDCl <sub>3</sub> , 75 MHz). ....                                                                                                                   | S43 |
| <b>Figure S30.</b> <sup>1</sup> H NMR spectrum of synthetic <b>16</b> (CDCl <sub>3</sub> , 300 MHz). ....                                                                                                                   | S44 |
| <b>Figure S31.</b> <sup>13</sup> C NMR spectrum of synthetic <b>16</b> (CDCl <sub>3</sub> , 75 MHz). ....                                                                                                                   | S44 |

|                                                                                                                                              |     |
|----------------------------------------------------------------------------------------------------------------------------------------------|-----|
| <b>Figure S32.</b> Bioactivity assay of nematophin and nevaltophins against Gram-positive <i>Micrococcus luteus</i> .....                    | S45 |
| <b>Figure S33.</b> Rhabduscin biosynthetic gene clusters found in <i>Xenorhabdus</i> PB62.4 and <i>X. miraniensis</i> DSM 17902 strains..... | S45 |
| <b>References</b> .....                                                                                                                      | S46 |

## Experimental procedures

### Bacterial strains and culture conditions

All *Xenorhabdus* and *Escherichia coli* (*E. coli*) DH10BMtaA strains used in this study (Table S4) were cultivated on lysogeny broth (LB, pH 7.0) agar medium at 30 °C and grown in liquid LB with shaking at 200 rpm. When required, antibiotics were added at final concentrations of 34 µg/mL for chloramphenicol, 50 µg/mL for kanamycin, and 50 µg/mL for spectinomycin, respectively. *E. coli* DH10BMtaA was generated by integration of the phosphopantetheinyltransferase gene from the myxothiazol biosynthetic gene cluster (*mtaA*) into the genome of *E. coli* DH10B. This strain was used for direct routine cloning and as a heterologous host for production of nonribosomal peptides.

### DNA manipulations

DNA manipulations, such as plasmid isolation from *E. coli* strains, DNA transformations, restriction digestion and DNA gel electrophoresis were performed according to standard protocols.<sup>1</sup> *Xenorhabdus* genomic DNA was isolated according to the instructions described in the QIAGEN kit. PCR amplifications were performed using Q5® High-Fidelity DNA Polymerase (New England Biolabs) or Phire Hot Start II PCR Master Mix (Thermo scientific) according to the manufacturer's protocol. PCR primers used in this study are listed in Table S5.

### Construction of *E. coli* strains for heterologous production of nematophin and nevaltophins

The plasmids pCOLA-ara-tacI, and pCDF-ara-tacI were generated in this lab, and are used as expression vectors for cloning of gene clusters under the control of *P<sub>BAD</sub>* promoter (Table S6). The plasmids used for production of new nematophin derivatives were constructed by cloning DNA fragments carrying either the *pb62* gene cluster into the above-described expression vectors, using Gibson Assembly Master Mix according

to the manufacturer's instructions. The DNA fragments with 25-30 bp of overlapping regions were obtained by PCR amplification from expression vectors and *Xenorhabdus* genomic DNA, respectively. The assembly reaction was performed by incubation at 50 °C for 60 min, then briefly digested with *DpnI* for 1 h and quenched at 85 °C for 20 min. Finally, *E. coli* DH10BMtaA was transformed with the assembled DNA plasmid by electroporation. The Genbank accession number for *pb62AB* is KR871223. The Genbank accession number for *the isnAB* (rhabduscin biosynthesis) from *Xenorhabdus* PB62.4 and *X. miraniensis* DSM17902 are KY346861 and KY346862, respectively.

### **Point mutations on PCP domains of RdpD and Pb62A**

Point mutations on PCP domains of RdpD and Pb62A were constructed by replacing the Ser residue on the conserved motif of LGGHSL with Ala.

### **Heterologous production of compounds in *E. coli***

The *E. coli* strains carrying plasmids containing desired gene or gene clusters were separately inoculated into 5 mL of liquid LB and grown overnight at 30 °C with shaking at 200 rpm. 100 µL of this overnight culture was transferred into 10 mL of fresh LB medium containing appropriate antibiotics, 0.1% arabinose (for induction), 1mM phenylethylamine (PEA) or tryptamine (TRA) and 2% (v/v) of Amberlite XAD-16 resin (Sigma-Aldrich). The culture was kept growing for 1 day at 30 °C and 200 rpm.

### **Culture extraction and LC-MS analysis of crude extracts from heterologous producers**

After 24 h, bacterial cells and the XAD resin were harvested by centrifugation at 4000 rpm for 15 min, followed by resuspending pellets in 10 mL of methanol and rotating for 1 h. The methanol extraction was then collected via a paper filter and evaporated under reduced pressure. The dried residue was dissolved in 2 mL methanol and analyzed (20 µL injection volume) by ESI-HPLC-MS (Dionex UltiMate 3000 system coupled to a Bruker AmaZon X mass spectrometer) using a ACQUITY UPLC™ BEH C18 column (130Å, 2.1 mm × 100 mm, 1.7 µm particle size, Waters GmbH) and an aqueous acetonitrile (containing 0.1 % formic acid, v/v) gradient from 5 to 95% over 16 min at a flow rate of 0.6 mL/min. ESIMS spectra were recorded in a positive ion mode with scanning range of 100-1200 *m/z*.

### **Preliminary structure elucidation of nevaltophins via isotope labelling experiments**

Isotope labelling experiments with heterologous producers of nevaltophins were performed as described previously.<sup>2,3</sup> Briefly, the production culture was individually fed with L-methionine-d<sub>3</sub>, L-valine-d<sub>8</sub>, L-leucine-d<sub>10</sub> (Sigma-Aldrich) with a final concentration of 1 mM. For inverse feeding experiments<sup>4</sup> were also carried out, the overnight culture (1:100) was inoculated into fresh ISOGRO-<sup>13</sup>C (Sigma-Aldrich) medium containing 10 mM K<sub>2</sub>HPO<sub>4</sub>, 10 mM KH<sub>2</sub>PO<sub>4</sub>, 8 mM MgSO<sub>4</sub>·7H<sub>2</sub>O and 90 μM CaCl<sub>2</sub>·H<sub>2</sub>O. The ISOGRO-<sup>13</sup>C (Sigma-Aldrich) production culture was supplemented with 0.1% arabinose, 1 mM PEA or TRA, 2% of adsorbent XAD-16 resin and 1 mM L-valine, 1 mM L-leucine or 1 mM L-isoleucine (Carl-Roth), and grown at 30 °C and 200 rpm for 24 h. Methanol extraction of the XAD resin and subsequent LC-MS analysis were performed as described above.

### **Isolation of nevaltophin A (5)**

To isolate **5**, 20 mL of a *E. coli* DH10B MtaA/pCX4 overnight culture was evenly divided into five 1 L Erlenmeyer flasks containing 400 mL LB medium containing kanamycin (50 μg/mL) and spectinomycin (100 μg/mL), each supplemented with 0.1% arabinose, 2 % (v/v) Amberlite XAD-16 resin (Sigma-Aldrich) and 1 mM PEA. These cultures were grown at 30 °C for 24 h with shaking at 200 rpm. The resulting mixtures of bacteria and XAD resin were harvested by centrifugation, then methanol (5 × 400 mL) was added and the mixtures shaken at room temperature for 1 h at 150 rpm. The mixtures were then filtered and the combined methanol extracts evaporated to dryness under reduced pressure. The crude residue (3.6 g) was dissolved in 15 mL water acidified with 50 μL of a 58% TFA solution (in water), and then extracted with ethyl acetate (3 × 20 mL). The combined organic layers were concentrated to dryness under reduced pressure. The residue (500 mg) was dissolved in MeOH (2 mL) and subjected to reverse phase preparative HPLC-MS (Waters, 515 HPLC 110 Pump, 2545 Binary Gradient Module, 2998 Photodiode Array Detector, SFO System Fluidics Organizer, Selector Valve, 2767 Sample Manager coupled to a 3100 mass detector; XBridge C18 column, 5 μm, 4.6 mm × 250 mm) using a gradient of 40-60% aqueous MeOH over 30 min to yield **5** (R<sub>t</sub> = 10.8 min; 8 mg/L). Nevaltophin A (**5**) purified from crude extracts as a yellow oil: <sup>1</sup>H (CDCl<sub>3</sub>, 500 MHz) and <sup>13</sup>C NMR (CDCl<sub>3</sub>, 125 MHz) are identical to those for synthetic **5**; positive-ion ESIMS *m/z* 347; HRESIMS *m/z* 347.2327 [M + H]<sup>+</sup> (calcd for C<sub>20</sub>H<sub>30</sub>N<sub>2</sub>O<sub>3</sub>, 347.2335).

### **Activity testing against *Micrococcus luteus***

Crude extracts (0.6 mg) and nematophin (50 µg) dissolved in methanol were separately added to paper filters, then placed on an LB agar plate inoculated with *Micrococcus luteus*. The plate was incubated at 30 °C overnight to observe the development of inhibition zones.

### **Antiparasite and cytotoxicity assay**

Bioactivity assays against *Trypanosoma brucei rhodesiense* (STIB900), *Trypanosoma cruzi* (Tulahuen C4), *Leishmania donovani* (MHOM-ET-67/L82), and *Plasmodium falciparum* (NF54) were conducted as described previously.<sup>5</sup> Cytotoxicity against the rat skeletal myoblasts (L6 cells) was assayed as described previously.<sup>6</sup>

### ***In vitro* prophenoloxidase (proPO) activation assay**

*Galleria mellonella* larvae were chilled at -20°C for 20 min. The frozen larvae were sterilized with 70% ethanol and thawed on ice, before being cut between the second proleg and tail and bled into a prechilled, sterilized 1.5 mL Eppendorf tube on ice. The collected hemolymph was diluted in a 3:1 ratio (v/v) with 50 mM phosphate buffered saline (PBS, pH 6.5) and centrifuged at 4000 g for 10 min at 4 °C to obtain hemolymph plasma. For each reaction mixture, 20 µL plasma was added to 120 µL PBS containing 5 µL *E. coli* lipopolysaccharide (LPS) (1 mg/mL; Sigma-Aldrich), then the mixture was left to stand at room temperature for 15 min. Finally, 20 µL compounds (5 mg/mL; crude extracts dissolved in PBS) were added, followed by addition of 25 µL 20 mM 4-methyl catechol (Sigma-Aldrich). The absorbance changes in the 96-well plate were measured at 490 nm by a Tecan microplate reader every 1 min for 1 h at room temperature with constant shaking as described previously.<sup>7</sup>

### **Phylogenetic analysis of C<sub>term</sub> domains and MT domains**

The alignment of protein sequences for terminal condensation (C<sub>term</sub>) domain of RdpD as well as the C<sub>term</sub> domains of RXP-NRPSs from selected *Xenorhabdus* and *Photorhabdus* strains was generated using ClustalW of Geneious 6.1.8 and then applied to MEGA 6.0 to construct the phylogenetic tree using neighbor-joining analysis in a JTT (Jones-Taylor-Thorton) model with 1000 bootstraps, other parameters were set as default values. The same method was applied to construction of phylogenetic tree for MT domains in selected RXP-NRPSs.

## General chemical methods

Anhydrous solvents were purchased from commercial suppliers and stored over activated molecular sieves. Reagents were purchased from commercial suppliers and used as received. Reactions were magnetically stirred and monitored by analytical thin layer chromatography (TLC) using aluminium-backed silica gel 60 pre-coated TLC plates, with visualization by KMnO<sub>4</sub> staining. Flash column chromatography was performed using silica gel 60. <sup>1</sup>H and <sup>13</sup>C NMR spectra were measured on a Bruker Avance 500 instrument (<sup>1</sup>H NMR: 500 MHz, <sup>13</sup>C NMR: 125 MHz) at 298 K. NMR data are reported in  $\delta$  (ppm) with CDCl<sub>3</sub> used as solvent and internal standard (<sup>1</sup>H NMR: 7.26 ppm, <sup>13</sup>C NMR: 77.0 ppm). *J* values are reported in Hz with multiplicities given as follows: s = singlet; d = doublet; t = triplet; q = quartet; quin. = quintet; m = multiplet; br = broad. Melting points were acquired on a Krüss M5000 automatic melting point meter.

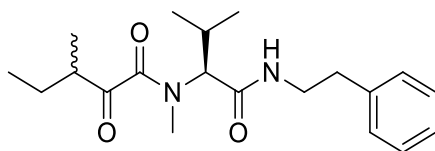

nevaltophin A (**5**)

**Synthesis of nevaltophin A (**5**):** To a stirred solution of *N*-Boc-*N*-methyl-L-valine (1 eq., 115 mg, 0.5 mmol), 1-ethyl-3-(3-dimethylaminopropyl)carbodiimide (1.1 eq., 85.3 mg, 0.55 mmol) and ethyl (hydroxyimino)cyanoacetate (OxymaPure®, 1 eq., 71 mg, 0.5 mmol) in anhydrous dichloromethane (2.5 mL) at 0°C under N<sub>2</sub> was added phenethylamine (1.5 eq., 95  $\mu$ L, 0.75 mmol). After 5 min, the reaction mixture was warmed to room temperature and stirred for a further 20 h. The reaction mixture was then diluted with dichloromethane (5 mL), washed with 1M HCl and saturated solutions of NaHCO<sub>3</sub> and brine, dried over anhydrous Na<sub>2</sub>SO<sub>4</sub> and concentrated *in vacuo*. To cleave the Boc protecting group, a solution of HCl (2M) in diethyl ether (1 mL) was added and the reaction mixture stirred at room temperature for 20 h before being concentrated *in vacuo*. Finally, to a stirred solution of the resulting product, 3-methyl-2-oxopentanoic acid (1.1 eq., 41 mg, 0.32 mmol) and 2-bromo-1-ethyl-pyridinium tetrafluoroborate (1.1 eq., 88 mg, 0.32 mmol) in anhydrous dichloromethane (3.2 mL) at -10°C under N<sub>2</sub> was added *N,N*-diisopropylethylamine (3 eq., 151  $\mu$ L, 0.87 mmol). After 20 min, the reaction mixture was gradually warmed to room temperature and stirred for a further 20 h, before being diluted with dichloromethane (5 mL), washed with 1M HCl and saturated solutions of NaHCO<sub>3</sub> and brine, and finally dried over anhydrous Na<sub>2</sub>SO<sub>4</sub> and



concentrated *in vacuo*. The residue was purified by flash chromatography (2% MeOH in DCM, silica gel 60) to yield **5** as a yellow oil (38.3 mg, 38%):  $^1\text{H}$  NMR ( $\text{CDCl}_3$ , 500 MHz)  $\delta$  7.32-7.13 (m, 11H), 6.06 (br s, 1H), 4.32 (dd,  $J$  = 11.2, 0.8 Hz, 1H), 3.63 (dq,  $J$  = 13.5, 6.8, 3.2 Hz, 1H), 3.56-3.40 (m, 4H), 3.30-3.18 (m, 1H), 3.00-2.92 (m, 1H), 2.90 (s, 3H), 2.82 (d,  $J$  = 3.1 Hz, 3H), 2.81-2.74 (m, 4H), 2.45-2.29 (m, 2H), 1.84-1.66 (m, 2H), 1.48-1.24 (m, 6H), 1.13 (dd,  $J$  = 13.6, 6.9 Hz, 3H), 1.10 (dd,  $J$  = 7.2, 3.0 Hz, 3H), 0.97-0.91 (m, 9H), 0.87-0.82 (m, 6H) and 0.78 (dd,  $J$  = 6.7, 1.5 Hz, 3H) ppm;  $^{13}\text{C}$  NMR ( $\text{CDCl}_3$ , 125 MHz)  $\delta$  205.8, 205.4, 203.4 (2C), 168.6 (2C), 168.5, 168.4, 168.0 (2C), 166.7, 166.5, 138.5 (2C), 128.7 (4C), 128.6 (2C), 128.5 (2C), 126.5, 126.4 (2C), 66.1, 65.9, 62.7, 44.4 (2C), 44.0, 43.8, 40.5 (3C), 35.7 (4C), 30.8, 28.2 (2C), 25.6, 25.4 (2C), 24.7, 24.5, 24.3 (2C), 19.7, 19.5 (2C), 18.8, 18.6, 18.4, 15.2, 14.0, 13.9 (2C), 11.7, 11.5 and 11.4 (2C) ppm; positive-ion ESIMS  $m/z$  347; HRESIMS  $m/z$  347.2331  $[\text{M} + \text{H}]^+$  (calcd for  $\text{C}_{20}\text{H}_{30}\text{N}_2\text{O}_3$ , 347.2335).

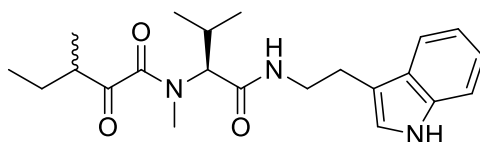

nevaltophin D (**8**)

**Synthesis of nevaltophin D (8):** To a stirred mixture of Boc-*N*-methyl-L-valine (1 eq., 38.5 mg, 0.17 mmol), 1-ethyl-3-(3-dimethylaminopropyl)carbodiimide (1.1 eq., 35.1 mg, 0.18 mmol) and ethyl (hydroxyimino)cyanoacetate (OxymaPure®, 1 eq., 23.7 mg, 0.17 mmol) in anhydrous dichloromethane (1 mL) at 0°C under  $\text{N}_2$  was added tryptamine (1.5 eq., 40.1 mg, 0.25 mmol). After 5 min, the reaction mixture was warmed to room temperature and stirred overnight. The reaction mixture was then diluted with dichloromethane (5 mL), washed with 1M HCl and saturated solutions of  $\text{NaHCO}_3$  and brine, dried over anhydrous  $\text{Na}_2\text{SO}_4$  and concentrated *in vacuo*. To cleave the Boc protecting group, a solution of HCl (2M) in diethyl ether (1 mL) was added and the reaction mixture stirred at room temperature overnight before being concentrated *in vacuo*. Finally, to a stirred solution of the resulting product, 3-methyl-2-oxopentanoic acid sodium salt (1.1 eq., 16.7 mg, 0.11 mmol) and 2-bromo-1-ethyl-pyridinium tetrafluoroborate (1.1 eq., 29.3 mg, 0.11 mmol) in anhydrous dichloromethane (1.1 mL) at 0°C under  $\text{N}_2$  was added *N,N*-diisopropylethylamine (3 eq., 50  $\mu\text{L}$ , 0.29 mmol). After 20 min, the reaction mixture was gradually warmed to room temperature and stirred overnight, before being diluted with dichloromethane (5 mL), washed with 1M HCl and

saturated solutions of NaHCO<sub>3</sub> and brine, and finally dried over anhydrous Na<sub>2</sub>SO<sub>4</sub> and concentrated *in vacuo*. The residue was purified by Agilent HPLC system (30 min gradient from isocratic 50% Acetonitrile in H<sub>2</sub>O, Agilent Eclipse XDB-C18 9.4 × 250 mm, 5 μm) to yield **8** as oil (7.6 mg, 32%): <sup>1</sup>H NMR (CDCl<sub>3</sub>, 400 MHz) δ 8.07 (br d, *J* = 25.4 Hz, 2H), 7.61 (t, *J* = 8.6 Hz, 2H), 7.35 (dd, *J* = 10.6, 4.2 Hz, 2H), 7.23-7.15 (m, 2H), 7.15-7.08 (m, 2H), 7.02 (d, *J* = 2.2 Hz, 1H), 6.97 (d, *J* = 1.1 Hz, 1H), 6.07 (s, 1H), 4.33 (d, *J* = 10.9 Hz, 1H), 3.75-3.58 (m, 2H), 3.57-3.43 (m, 7H), 3.26-3.16 (m, 1H), 2.97 (dt, *J* = 9.9, 4.9 Hz, 5H), 2.90 (d, *J* = 2.3 Hz, 4H), 2.83 (d, *J* = 0.9 Hz, 3H), 2.38 (dt, *J* = 18.4, 12.2, 6.2 Hz, 2H), 1.76 (dddd, *J* = 15.4, 13.4, 7.9, 5.0 Hz, 2H), 1.48-1.24 (m, 3H), 1.15-1.04 (m, 6H), 0.98-0.90 (m, 10H), 0.89-0.83 (m, 6H) and 0.79 (dd, *J* = 6.7, 1.4 Hz, 1H) ppm; <sup>13</sup>C NMR (CDCl<sub>3</sub>, 100 MHz) δ 205.8, 205.5, 203.9, 168.7, 168.6, 168.2, 167.1, 166.9, 136.6, 127.3, 122.4, 122.4, 122.3, 122.2, 119.6, 119.5, 118.9, 118.8, 112.9, 112.6, 111.4, 111.3, 66.3, 66.2, 62.8, 51.0, 44.7, 44.2, 44.0, 39.7, 39.5, 30.9, 28.4, 28.3, 25.8, 25.5, 24.9, 24.7, 24.4, 19.9, 19.7, 19.6, 19.0, 18.8, 18.5, 15.3, 14.2, 14.0, 11.8 and 11.6 ppm; positive-ion ESIMS *m/z* 386; HRESIMS *m/z* 386.2438 [M + H]<sup>+</sup> (calcd for C<sub>22</sub>H<sub>32</sub>N<sub>3</sub>O<sub>3</sub>, 386.2444).

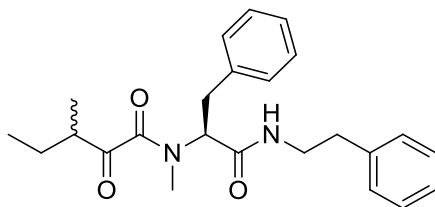

nevaltophin G (**12**)

**Synthesis of nevaltophin G (12):** To a stirred mixture of *N*-Boc-*N*-methyl-L-phenylalanine dicyclohexylamine salt (1 eq., 76.8 mg, 0.17 mmol), 1-ethyl-3-(3-dimethylaminopropyl)carbodiimide (1.1 eq., 31.2 mg, 0.18 mmol) and ethyl (hydroxyimino)cyanoacetate (OxymaPure®, 1 eq., 23.7 mg, 0.17 mmol) in anhydrous dichloromethane (1 mL) at 0°C under N<sub>2</sub> was added phenethylamine (1.5 eq., 32 μL, 0.25 mmol). After 5 min, the reaction mixture was warmed to room temperature and stirred overnight. The reaction mixture was then diluted with dichloromethane (5 mL), washed with 1M HCl and saturated solutions of NaHCO<sub>3</sub> and brine, dried over anhydrous Na<sub>2</sub>SO<sub>4</sub> and concentrated *in vacuo*. To cleave the Boc protecting group, a solution of HCl (2M) in diethyl ether (1 mL) was added and the reaction mixture stirred at room temperature overnight before being concentrated *in vacuo*. Finally, to a stirred

solution of the resulting product, 3-methyl-2-oxopentanoic acid (1.1 eq., 13.7 mg, 0.11 mmol) and 2-bromo-1-ethyl-pyridinium tetrafluoroborate (1.1 eq., 29.3 mg, 0.11 mmol) in anhydrous dichloromethane (1.1 mL) at 0°C under N<sub>2</sub> was added *N,N*-diisopropylethylamine (3 eq., 50 µL, 0.29 mmol). After 20 min, the reaction mixture was gradually warmed to room temperature and stirred overnight, before being diluted with dichloromethane (5 mL), washed with 1M HCl and saturated solutions of NaHCO<sub>3</sub> and brine, and finally dried over anhydrous Na<sub>2</sub>SO<sub>4</sub> and concentrated *in vacuo*. The residue was purified by Agilent HPLC system (25 min gradient from 55-63% Acetonitrile in H<sub>2</sub>O; Agilent Eclipse XDB-C18 9.4 x 250 mm, 5 µm) to yield **12** as a yellow oil (9.5 mg, 22%): <sup>1</sup>H NMR (CDCl<sub>3</sub>, 500 MHz) δ 7.31-7.24 (m, 7H), 7.24-7.18 (m, 7H), 7.15 (d, *J* = 7.8 Hz, 2H), 7.13-7.09 (m, 2H), 7.06 (d, *J* = 7.6 Hz, 2H), 6.00 (br s, 1H), 5.27 (ddd, *J* = 19.6, 9.6, 6.8 Hz, 1H), 4.14 (dd, *J* = 9.8, 4.7 Hz, 1H), 3.66 (tdd, *J* = 13.9, 7.1, 2.2 Hz, 1H), 3.57-3.49 (m, 1H), 3.48-3.41 (m, 1H), 3.35 (dd, *J* = 14.7, 6.7 Hz, 1H), 3.17 (dd, *J* = 14.5, 4.6 Hz, 1H), 3.04-2.93 (m, 2H), 2.88 (d, *J* = 2.8 Hz, 3H), 2.86-2.78 (m, 5H), 2.78-2.70 (m, 3H), 1.66-1.55 (m, 5H), 1.36-1.20 (m, 3H), 1.09-0.98 (m, 1H), 0.95 (dd, *J* = 9.7, 6.8 Hz, 3H) and 0.81 (td, *J* = 7.3, 2.5 Hz, 3H) ppm. <sup>13</sup>C NMR (CDCl<sub>3</sub>, 125 MHz) δ 205.8, 203.7, 203.6, 168.8, 168.5, 167.3, 167.2, 138.6, 137.4, 137.3, 136.6, 136.5, 129.3, 129.2, 129.1, 129.0, 128.9, 128.8, 128.8, 127.2, 127.1, 126.7, 62.4, 62.3, 57.1, 56.9, 44.5, 44.4, 43.9, 43.8, 41.0, 40.9, 35.8, 34.0, 33.5, 28.7, 28.6, 24.8, 24.2, 24.1, 23.9, 13.9, 13.7, 13.5, 11.8, 11.6, and 11.4 ppm; positive-ion ESIMS *m/z* 395; HRESIMS *m/z* 395.2309 [M + H]<sup>+</sup> (calcd for C<sub>24</sub>H<sub>31</sub>N<sub>2</sub>O<sub>3</sub>, 395.2335).

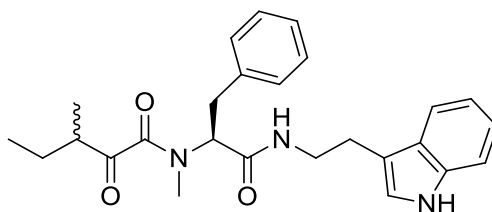

nevaltophin H (**13**)

**Synthesis of nevaltophin H (13):** To a stirred mixture of *N*-Boc-*N*-methyl-L-phenylalanine dicyclohexylamine salt (1 eq., 76.8 mg, 0.17 mmol), 1-ethyl-3-(3-dimethylaminopropyl)carbodiimide (1.1 eq., 31.2 mg, 0.18 mmol) and ethyl (hydroxyimino)cyanoacetate (OxymaPure®, 1 eq., 23.7 mg, 0.17 mmol) in anhydrous dichloromethane (1 mL) at 0°C under N<sub>2</sub> was added tryptamine (1.5 eq., 40.1 mg, 0.25 mmol). After 5 min, the reaction mixture was warmed to room temperature and stirred

overnight. The reaction mixture was then diluted with dichloromethane (5 mL), washed with 1M HCl and saturated solutions of NaHCO<sub>3</sub> and brine, dried over anhydrous Na<sub>2</sub>SO<sub>4</sub> and concentrated *in vacuo*. To cleave the Boc protecting group, a solution of HCl (2M) in diethyl ether (1 mL) was added and the reaction mixture stirred at room temperature overnight before being concentrated *in vacuo*. Finally, to a stirred solution of the resulting product, 3-methyl-2-oxopentanoic acid (1.1 eq., 13.7 mg, 0.11 mmol) and 2-bromo-1-ethyl-pyridinium tetrafluoroborate (1.1 eq., 29.3 mg, 0.11 mmol) in anhydrous dichloromethane (1.1 mL) at 0°C under N<sub>2</sub> was added *N,N*-diisopropylethylamine (3 eq., 50 µL, 0.29 mmol). After 20 min, the reaction mixture was gradually warmed to room temperature and stirred overnight, before being diluted with dichloromethane (5 mL), washed with 1M HCl and saturated solutions of NaHCO<sub>3</sub> and brine, and finally dried over anhydrous Na<sub>2</sub>SO<sub>4</sub> and concentrated *in vacuo*. The residue was purified by Agilent HPLC system (25 min gradient from 55-63% Acetonitrile in H<sub>2</sub>O, Agilent Eclipse XDB-C18 9.4 × 250 mm, 5 µm) to yield **13** as a yellow oil (7.6 mg, 16%): <sup>1</sup>H NMR (CDCl<sub>3</sub>, 500 MHz) δ 8.04 (br d, *J* = 22.6 Hz, 2H), 7.59 (dd, *J* = 14.9, 7.9 Hz, 2H), 7.35 (dd, *J* = 8.1, 1.8 Hz, 2H), 7.30-7.24 (m, 2H), 7.23-7.17 (m, 6H), 7.12 (t, *J* = 7.5 Hz, 2H), 7.05 (d, *J* = 7.6 Hz, 2H), 6.99-6.92 (m, 2H), 5.99 (d, *J* = 4.5 Hz, 1H), 5.28 (ddd, *J* = 19.6, 9.9, 6.6 Hz, 1H), 4.13 (ddd, *J* = 9.9, 4.6, 1.6 Hz, 1H), 3.73-3.49 (m, 4H), 3.34 (dd, *J* = 14.7, 6.6 Hz, 1H), 3.16 (dd, *J* = 14.5, 3.8 Hz, 1H), 3.05-2.96 (m, 4H), 2.95-2.90 (m, 2H), 2.86 (d, *J* = 4.9 Hz, 3H), 2.78 (d, *J* = 5.9 Hz, 3H), 2.74-2.64 (m, 1H), 1.59 (dt, *J* = 14.9, 13.6, 7.4 Hz, 2H), 1.33-1.18 (m, 2H), 1.07-0.95 (m, 1H), 0.92 (dd, *J* = 6.8, 3.4 Hz, 3H) and 0.87-0.72 (m, 6H) ppm. <sup>13</sup>C NMR (CDCl<sub>3</sub>, 125 MHz) δ 205.7, 204.0, 203.9, 168.6, 168.5, 168.4, 167.4, 167.3, 137.4, 137.3, 136.6, 136.5, 129.3, 129.1, 129.0, 128.8, 128.7, 127.3, 127.2, 127.0, 122.5, 122.3, 119.6, 118.8, 112.8, 112.7, 112.5, 111.4, 111.3, 62.5, 62.4, 56.9, 56.8, 51.0, 44.6, 44.5, 43.9, 43.89, 40.0, 39.6, 34.0, 33.5, 33.40, 30.9, 30.8, 28.7, 28.6, 25.4, 25.3, 24.8, 24.1, 23.9, 13.8, 13.7, 13.3, 11.8, 11.6, 11.50 and 11.4 ppm; positive-ion ESIMS *m/z* 434; HRESIMS *m/z* 434.2419 [M + H]<sup>+</sup> (calcd for C<sub>26</sub>H<sub>32</sub>N<sub>3</sub>O<sub>3</sub>, 434.2444).

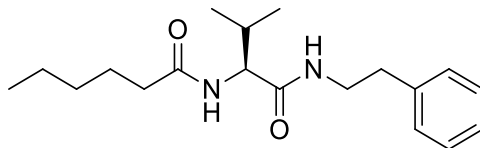

nevaltophin I (**14**)

**Synthesis of nevaltophin I (14):** 182 mg of *N*-Boc-L-valine (1 eq., 0.84 mmol) was dissolved in 4 mL of anhydrous dichloromethane under argon. The solution was cooled

to 0°C then 177 mg of 1-ethyl-3-(3-dimethylaminopropyl)carbodiimide (1.1 eq., 0.924 mmol) and 120 mg of ethyl (hydroxyimino)cyanoacetate (OxymaPure®, 1 eq., 0.84 mmol) were added followed by 121 mg of phenylethyl amine (1.5 eq., 1.26 mmol). After 15 min, the mixture was warmed to room temperature and stirred overnight. Water (10 mL) was then added and the organic layer successively extracted with saturated solutions of NaHCO<sub>3</sub>, brine, NaHSO<sub>4</sub> and brine. The dichloromethane was removed under reduced pressure, before addition of 10 mL 2M HCl in diethyl ether. The mixture was then stirred at room temperature overnight, and the resulting precipitate filtered and washed with diethyl ether. 5 mL of anhydrous dichloromethane was then added to the precipitate under argon, followed by 280 µL of diisopropylethylamine (2 eq., 1.68 mmol). The mixture was cooled to 0°C then 124 µL of hexanoyl chloride (1.05 eq., 0.88 mmol) was added slowly and the mixture stirred at room temperature overnight. The mixture was extracted twice with a saturated solution of NaHCO<sub>3</sub> and brine, then the solvent was removed under reduced pressure to yield 136 mg (60%) of **14** as a pale yellow solid: m.p. 162°C; <sup>1</sup>H NMR (CDCl<sub>3</sub>, 300 MHz) δ 7.32-7.14 (m, 5H), 6.64 (br t, *J* = 5.3 Hz, 1H), 6.37 (br d, *J* = 8.8 Hz, 1H), 4.22 (dd, *J* = Hz, 1H), 3.57 (m, 1H), 3.43 (m, 1H), 2.81 (t, *J* = 7.2 Hz, 2H), 2.19 (m, 2H), 2.01 (dsextet, *J* = 13.9, 6.9 Hz, 1H), 1.68-1.52 (m, 2H), 1.35-1.23 (m, 4H) and 0.89 (m, 9H) ppm; <sup>13</sup>C NMR (CDCl<sub>3</sub>, 75 MHz) δ 173.2, 171.4, 138.6, 128.6 (2C), 128.5 (2C), 126.5, 58.5, 40.6, 36.6, 35.6, 31.4, 31.1, 25.4, 22.3, 19.2, 18.3 and 13.9 ppm; positive-ion ESIMS *m/z* 319; HRESIMS *m/z* 319.2390 [M + H]<sup>+</sup> (calcd for C<sub>19</sub>H<sub>31</sub>N<sub>2</sub>O<sub>2</sub>, 319.2386).

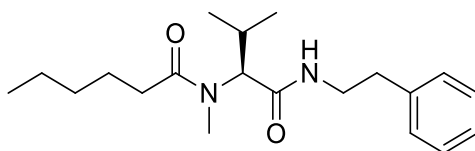

nevaltophin J (**15**)

**Synthesis of nevaltophin J (15):** 64 mg of *N*-Boc-*N*-methyl-L-valine (1 eq., 0.276 mmol) was dissolved in 1.5 mL of anhydrous dichloromethane under argon. The solution was cooled to 0°C then 58 mg of 1-ethyl-3-(3-dimethylaminopropyl)carbodiimide (1.1 eq., 0.303 mmol) and 39 mg of ethyl (hydroxyimino)cyanoacetate (OxymaPure®, 1 eq., 0.276 mmol) were added followed by 121 mg of phenylethyl amine (1.5 eq., 0.404 mmol). After 15 min, the mixture was warmed to room temperature and stirred overnight. Water (5 mL) was then added and the organic layer successively extracted with saturated solutions of NaHCO<sub>3</sub>, brine, NaHSO<sub>4</sub> and brine. The dichloromethane was

removed under reduced pressure, before addition of 4 mL of 2M HCl in diethyl ether. The mixture was stirred overnight at room temperature, and the resulting precipitate filtered and washed with diethyl ether. 2 mL of anhydrous dichloromethane was added to the precipitate under argon, followed by 95  $\mu$ L of diisopropylethylamine (2 eq., 0.55 mmol). The mixture was cooled to 0°C then 39  $\mu$ L of hexanoyl chloride (1.05 eq., 0.28 mmol) was added slowly and the mixture stirred at room temperature overnight, before extracted with saturated solutions of NaHCO<sub>3</sub> and brine. The solvent was then removed under reduced pressure to yield 66 mg (74%) of **15** as a pale yellow oil: <sup>1</sup>H NMR (CDCl<sub>3</sub>, 300 MHz)  $\delta$  7.32-7.14 (m, 5H), 6.35 (m, 1H), 4.48 (d, *J* = 11.2 Hz, 1H), 3.49 (m, 2H), 2.87 (s, 3H), 2.78 (m, 2H), 2.37-2.15 (m, 3H), 1.60 (m, 2H), 1.39-1.25 (m, 4H), 0.94-0.88 (m, 6H) and 0.80 (d, *J* = 6.7 Hz, 3H) ppm; <sup>13</sup>C NMR (CDCl<sub>3</sub>, 75 MHz)  $\delta$  174.4, 170.0, 138.7, 128.6 (2C), 128.3 (2C), 126.3, 62.4, 40.0, 35.6, 33.6, 31.4, 30.6, 25.5, 24.6, 22.4, 19.5, 18.4 and 13.9 ppm; positive-ion ESIMS *m/z* 333; HRESIMS *m/z* 333.2541 [*M* + *H*]<sup>+</sup> (calcd for C<sub>20</sub>H<sub>33</sub>N<sub>2</sub>O<sub>2</sub>, 333.2542).

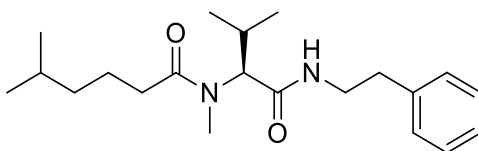

nevaltophin K (**16**)

**Synthesis of nevaltophin K (16):** To a stirred solution of *N*-Boc-*N*-methyl-L-valine (1 eq., 115 mg, 0.5 mmol), 1-ethyl-3-(3-dimethylaminopropyl)carbodiimide (1.1 eq., 85.3 mg, 0.55 mmol) and ethyl (hydroxyimino)cyanoacetate (OxymaPure®, 1 eq., 71 mg, 0.5 mmol) in anhydrous dichloromethane (2.5 mL) at 0°C under N<sub>2</sub> was added phenethylamine (1.5 eq., 95  $\mu$ L, 0.75 mmol). After 5 min, the reaction mixture was warmed to room temperature and stirred for a further 20 h. The reaction mixture was then diluted with dichloromethane (5 mL) and washed with 1M HCl and saturated solutions of NaHCO<sub>3</sub> and brine, dried over anhydrous Na<sub>2</sub>SO<sub>4</sub> and concentrated *in vacuo*. To cleave the Boc protecting group, a solution of HCl (2M) in diethyl ether (1 mL) was added and the reaction mixture stirred at room temperature for 20 h before being concentrated *in vacuo*. To a stirred solution of this product (84.8 mg) in anhydrous dichloromethane (1 mL) at room temperature under N<sub>2</sub> was added 5-methylhexanoyl chloride (1.4 eq., 73 mg, 0.49 mmol) prepared according to the literature in dichloromethane (1.5 mL) and *N,N*-diisopropylethylamine (2.7 eq., 170  $\mu$ L, 0.98 mmol). The reaction mixture was stirred for 16 h before being washed with saturated solutions of

NaHCO<sub>3</sub> and brine, dried (Na<sub>2</sub>SO<sub>4</sub>), and concentrated *in vacuo* to yield **16** as a yellow oil (90.8 mg, 72%): <sup>1</sup>H NMR (CDCl<sub>3</sub>, 300 MHz) δ 7.33-7.13 (m, 13H), 6.14 (br m, 1H), 4.43 (d, *J* = 11.2 Hz, 1H), 3.50 (m, 4H), 2.85 (s, 3H), 2.78 (m, 4H), 2.75 (s, 3H), 2.43 (t, *J* = 7.4 Hz, 2H), 2.34-2.13 (m, 4H), 1.72-1.50 (m, 8H), 1.29-1.15 (m, 6H) and 0.89 (m, 20H) ppm; <sup>13</sup>C NMR (CDCl<sub>3</sub>, 75 MHz) δ 174.5, 170.1, 169.6, 138.7, 128.7 (2C), 128.5 (2C), 126.4, 64.7, 62.6, 40.2, 40.0, 38.6, 38.0, 35.8, 35.7, 35.5, 33.9, 27.9, 27.7, 25.6, 22.8, 22.5, 22.4, 22.1, 19.6 and 18.5 ppm; positive-ion ESIMS *m/z* 346; HRESIMS *m/z* 347.2694 [M + H]<sup>+</sup> (calcd for C<sub>21</sub>H<sub>35</sub>N<sub>2</sub>O<sub>2</sub>, 347.2699).

### Advanced Marfey's Analysis

Synthetic and authentic **5** (0.5 mg each) were separately hydrolysed by treatment with aqueous HCl (6M, 0.8 mL) in Ace pressure tubes at 110°C for 16 h. The resulting hydrolysates were concentrated to dryness and then resuspended in H<sub>2</sub>O (100 µL). To 50 µL aliquots of this solution in black microcentrifuge tubes were added NaHCO<sub>3</sub> (1M, 10 µL) and *N*α-(5-fluoro-2,4-dinitrophenyl)-L-leucinamide or -D-leucinamide (L-FDLA or D-FDLA, 100 µL of a 1% solution in acetone), before heating at 40°C for 1 h. The reaction mixtures were then cooled to room temperature, quenched (1M HCl, 10 µL) and concentrated to dryness. The residues were dissolved (MeOH, 400 µL) and analysed by RPHPLC (flow rate of 0.6 mL/min, gradient of aqueous acetonitrile (ACN) containing 0.1% formic acid with the following program: 0-2 min, 5-20% ACN; 2-4 min, 20% ACN; 4-38 min, 20-60% ACN; 38-40 min, 60-95% ACN; 40-45 min, 95% ACN; 45-47 min, 95-5% ACN; 47-50 min, 5% ACN) coupled to positive and negative ion ESI-MS (Figure S16). Authentic standards derived from commercial *N*-Me-L-Val were also prepared using the above-described procedure, with the omission of the hydrolysis step.

### Quantification of production titer

Compounds **1** and **8** are the main nematophin and nevaltophin derivatives produced in both wild type strains and heterologous expression strains, which were chosen as standards for the quantification of compounds **1-10**. The standard compounds were prepared at different concentrations (100, 50, 25, 12.5, 6.25, 3.125, 1.56, 0.78, 0.39 and 0.039 µg/mL) and measured by LC-MS. The peak area for each compound at different concentration was calculated using Bruker Compass Data Analysis program to generate the equations for compounds **1** and **8** with  $y = 3E+08x$  ( $R^2 = 0.9971$ ) and  $y = 8E+07x$  ( $R^2$

= 0.9929), respectively. The samples of crude extract from each strain were prepared as described above and analyzed by LC-MS. The peak area of expected compound was obtained and its corresponding production titer was calculated based on the equation generated from standard compound.



## Supplementary Tables

**Table S1.** HR-Masses and chemical formula of compounds in this study

| Compound | Calculated mass<br>[M+H] <sup>+</sup> | Detected mass<br>[M+H] <sup>+</sup> | Chemical<br>formula                                           | RDB  | Delta<br>ppm |
|----------|---------------------------------------|-------------------------------------|---------------------------------------------------------------|------|--------------|
| 1        | 273.1598                              | 273.1595                            | C <sub>16</sub> H <sub>21</sub> O <sub>2</sub> N <sub>2</sub> | 7.5  | 0.9          |
| 2        | 259.1441                              | 259.1438                            | C <sub>15</sub> H <sub>19</sub> O <sub>2</sub> N <sub>2</sub> | 7.5  | 1.1          |
| 3        | 234.1494                              | 234.1495                            | C <sub>14</sub> H <sub>20</sub> O <sub>2</sub> N              | 5.5  | 0.8          |
| 4        | 220.1696                              | 220.1694                            | C <sub>14</sub> H <sub>22</sub> ON                            | 4.5  | 1.1          |
| 5        | 347.2323                              | 347.2329                            | C <sub>20</sub> H <sub>31</sub> O <sub>3</sub> N <sub>2</sub> | 6.5  | 1.8          |
| 6        | 333.2173                              | 333.2169                            | C <sub>19</sub> H <sub>29</sub> O <sub>3</sub> N <sub>2</sub> | 6.5  | 1.1          |
| 7        | 319.2016                              | 319.2012                            | C <sub>18</sub> H <sub>27</sub> O <sub>3</sub> N <sub>2</sub> | 6.5  | 1.3          |
| 8        | 386.2435                              | 386.2438                            | C <sub>22</sub> H <sub>32</sub> O <sub>3</sub> N <sub>3</sub> | 8.5  | 0.7          |
| 9        | 372.2282                              | 372.2277                            | C <sub>21</sub> H <sub>30</sub> O <sub>3</sub> N <sub>3</sub> | 8.5  | 1.2          |
| 10       | 358.2486                              | 358.2489                            | C <sub>21</sub> H <sub>32</sub> O <sub>2</sub> N <sub>3</sub> | 7.5  | 0.8          |
| 11       | 235.1805                              | 235.1806                            | C <sub>14</sub> H <sub>23</sub> ON <sub>2</sub>               | 4.5  | -0.4         |
| 12       | 395.2329                              | 395.2326                            | C <sub>24</sub> H <sub>31</sub> O <sub>3</sub> N <sub>2</sub> | 10.5 | 0.8          |
| 13       | 434.2438                              | 434.2432                            | C <sub>26</sub> H <sub>32</sub> O <sub>3</sub> N <sub>3</sub> | 12.5 | 1.4          |
| 14       | 319.2380                              | 319.2384                            | C <sub>19</sub> H <sub>31</sub> O <sub>2</sub> N <sub>2</sub> | 5.5  | -1.2         |
| 15       | 333.2537                              | 333.2528                            | C <sub>20</sub> H <sub>33</sub> O <sub>2</sub> N <sub>2</sub> | 5.5  | 2.6          |
| 16       | 347.2693                              | 347.2688                            | C <sub>21</sub> H <sub>35</sub> O <sub>2</sub> N <sub>2</sub> | 5.5  | 1.4          |

**Table S2.** Bioactivity assay of compounds against selected tropical pathogens

| Pathogen                     | Disease                 | IC <sub>50</sub> (mg/mL) of compounds against different parasites |      |      |      |      |                         |
|------------------------------|-------------------------|-------------------------------------------------------------------|------|------|------|------|-------------------------|
|                              |                         | 1                                                                 | 5    | 14   | 15   | 16   | Positive control        |
| <i>Trypanosoma brucei</i>    | Sleeping sickness       | 34.5                                                              | 14.5 | 1.3  | 5.2  | 3.7  | 0.003 (melarsoprol)     |
| <i>rhodesiense</i>           |                         |                                                                   |      |      |      |      |                         |
| <i>Trypanosoma cruzi</i>     | Chagas                  | 47.3                                                              | 35.9 | 28.7 | 16.7 | 14.3 | 0.665 (benznidazole)    |
| <i>Leishmania donovani</i>   | Cutaneous leishmaniasis | 17.1                                                              | 12.7 | 9.4  | 6.5  | 4.5  | 0.056 (miltefosine)     |
| <i>Plasmodium falciparum</i> | Malaria                 | 27.1                                                              | 13.1 | 11.5 | 7.4  | 4.4  | 0.002 (chloroquine)     |
| Cytotoxicity                 |                         | 49.3                                                              | 49   | 30.3 | 18.1 | 14.1 | 0.009 (podophyllotoxin) |

**Table S3.** A domain specificity-conferring codes

| A domain specificity-conferring codes |     |     |     |     |     |     |     |     |     |     | Specificity                 |
|---------------------------------------|-----|-----|-----|-----|-----|-----|-----|-----|-----|-----|-----------------------------|
| Variability                           | 3%  | 16% | 16% | 39% | 52% | 13% | 26% | 23% | 26% | 0%  |                             |
| Position                              | 235 | 236 | 239 | 278 | 299 | 301 | 322 | 330 | 331 | 517 |                             |
| <b>Pb62A-A</b>                        | V   | A   | I   | M   | L   | A   | A   | S   | M   | K   | $\alpha$ -ketoisovaleryl    |
| <b>RdpD-A</b>                         | V   | A   | I   | M   | L   | G   | A   | S   | M   | K   | $\alpha$ -ketoisovaleryl    |
| BarE-A                                | V   | G   | I   | L   | V   | G   | G   | T   | M   | K   | $\alpha$ -ketoisocapryl     |
| CesA-A1                               | V   | G   | V   | W   | V   | G   | T   | S   | G   | K   | $\alpha$ -ketoisocapryl     |
| CesB-A1                               | V   | G   | F   | W   | V   | A   | V   | S   | D   | K   | $\alpha$ -ketoisovaleryl    |
| Vlm1-A1                               | A   | A   | L   | W   | I   | A   | V   | S   | G   | K   | $\alpha$ -ketoisovaleryl    |
| Vlm2-A1                               | V   | V   | I   | W   | I   | A   | E   | N   | M   | K   | pyruvate                    |
| GreA                                  | V   | A   | E   | F   | S   | G   | G   | A   | C   | K   | 4-hydroxyphenylpyruvic acid |
| <b>Pb62B-A</b>                        | D   | A   | L   | V   | L   | A   | V   | S   | I   | K   | Val                         |
| BacA                                  | D   | G   | F   | F   | L   | G   | V   | V   | Y   | K   | Ile                         |
| FenB                                  | D   | A   | F   | F   | Y   | G   | I   | T   | F   | K   | Ile                         |

**Table S4.** Bacterial strains used in this study

| Strain                           | Relevant Genotype                                                                                                                                                                                                                                                                                           | Reference/Strain No. |
|----------------------------------|-------------------------------------------------------------------------------------------------------------------------------------------------------------------------------------------------------------------------------------------------------------------------------------------------------------|----------------------|
| <b><i>E.coli</i></b>             |                                                                                                                                                                                                                                                                                                             |                      |
| DH10BMtaA                        | F <sup>-</sup> <i>mcrA</i> , $\Delta$ ( <i>mrr-hsdRMS-mcrBC</i> ), $\Phi$ 80/ <i>lacZ</i> $\Delta$ M15, $\Delta$ <i>lacX74</i> , <i>recA1</i> , <i>endA1</i> , <i>araD139</i> , $\Delta$ ( <i>ara leu</i> )7697, <i>galU</i> , <i>galK</i> , <i>rpsL</i> , <i>nupG</i> , $\lambda$ -<br>, <i>entD::mtaA</i> | This lab             |
| <b><i>Xenorhabdus</i></b>        |                                                                                                                                                                                                                                                                                                             |                      |
| <i>X. nematophila</i> ATCC 19601 | Wild type                                                                                                                                                                                                                                                                                                   | This lab             |
| RdpD-PCP <sub>Ala</sub>          | Point mutation on RdpD-PCP domain in wild type                                                                                                                                                                                                                                                              | This study           |
| PB62.4                           | Wild type                                                                                                                                                                                                                                                                                                   | This lab             |

**Table S5.** Primers used in this study

| Primer name                                                  | Sequence (5'-3')                                                                                                                                                                                                                                               | Targeting DNA fragment                                                                                                                               |
|--------------------------------------------------------------|----------------------------------------------------------------------------------------------------------------------------------------------------------------------------------------------------------------------------------------------------------------|------------------------------------------------------------------------------------------------------------------------------------------------------|
| XC65-Fw<br>XC65-Rv                                           | ATGAAAAATGCAATTCAAATTATTAATG<br>TTAGTCATAAAAAATGATGGATGCTCTC                                                                                                                                                                                                   | <i>rdpD</i> gene from <i>X. nematophila</i> ATCC 19601                                                                                               |
| XC66-Fw<br>XC66-Rv                                           | AAGAGAGCATCCATCATTTCATGACTAACAATTAATCATCG<br>GCTCGTATAATG<br>ATTAATAATTTGAATTGCATTTTCATGGAATTCCTCCTGTTA<br>GCCCAAAAAAAC                                                                                                                                        | pCDF-ara-tacI vector backbone for <i>rdpD</i> (pCX47)                                                                                                |
| XC7-Fw<br>XC7-Rv                                             | ATGAAAAATGCAGCACAAATGTTC<br>TCAGTGATAAAAAATGACTAATAC                                                                                                                                                                                                           | <i>pb62</i> gene cluster from <i>Xenorhabdus</i> PB62.4                                                                                              |
| XC8-Fw<br>XC8-Rv                                             | AAAGAAAGTATTAGTCATTTTATCACTGACAATTAATCATC<br>GGCTCGTATAATG<br>AAAGAAAGTATTAGTCATTTTATCACTGACAATTAATCATC<br>GGCTCGTATAATG                                                                                                                                       | pCOLA-ara-tacI vector backbone for pCX4                                                                                                              |
| XC7-Fw<br>XC50-Rv                                            | ATGAAAAATGCAGCACAAATGTTC<br>TCATATATCACCTTCCAATAGTTCC                                                                                                                                                                                                          | <i>pb62A</i> in <i>pb62</i> gene cluster from <i>Xenorhabdus</i> PB62.4                                                                              |
| XC50-Fw<br>XC8-Rv                                            | ATGCTGGAAGTATTGGAAGGTGATATATGACAATTAATCATC<br>GGCTCGTATAATGTGTG<br>AAAGAAAGTATTAGTCATTTTATCACTGACAATTAATCATC<br>GGCTCGTATAATG                                                                                                                                  | pCOLA-ara-tacI vector backbone for pCX34                                                                                                             |
| XC51-Fw<br>XC7-Rv                                            | ATGAGAAATGCAGCACAAATTATTAATG<br>TCAGTGATAAAAAATGACTAATAC                                                                                                                                                                                                       | <i>pb62B</i> in <i>pb62</i> gene cluster from <i>Xenorhabdus</i> PB62.4                                                                              |
| XC8-Fw<br>XC51-Rv                                            | AAAGAAAGTATTAGTCATTTTATCACTGACAATTAATCATC<br>GGCTCGTATAATG<br>ATTAATAATTTGTGCTGCATTTCTCATGGAATTCCTCCTGTT<br>AGCCCAAAAAAACG                                                                                                                                     | pCDF-ara-tacI vector backbone for pCX35                                                                                                              |
| XC7-Fw<br>XC89-Rv<br>XC89-Fw<br>XC50-Rv<br>XC50-Fw<br>XC8-Rv | ATGAAAAATGCAGCACAAATGTTC<br>AGGCGTGTGGCTTGTAATGCATGCCCGCCCAG<br>ACGCTGGGCGGGCATGCATTACAAGCCACACG<br>TCATATATCACCTTCCAATAGTTCC<br>ATGCTGGAAGTATTGGAAGGTGATATATGACAATTAATCATC<br>GGCTCGTATAATGTGTG<br>AAAGAAAGTATTAGTCATTTTATCACTGACAATTAATCATC<br>GGCTCGTATAATG | Ser in the conserved motif of LGGHSL from PCP domain of Pb62A was replaced by Ala, the encoding sequence was assembled into pCOLA-ara-tacI for pCX68 |

**Table S6.** Plasmids used in this study

| Plasmid                                                                            | Description                                                                                                                                                                  | References   |
|------------------------------------------------------------------------------------|------------------------------------------------------------------------------------------------------------------------------------------------------------------------------|--------------|
| pCOLA-ara-tacI                                                                     | 3,345 bp, modified from pCOLA_tacI/I that contains arabinose-inducible promotor and kanamycin resistance gene (Km <sup>R</sup> )                                             | This lab     |
| pCDF-ara-tacI                                                                      | 3,404 bp, modified from pCDF_tacI/I that contains arabinose-inducible promotor and spectinomycin resistance gene (Sm <sup>R</sup> )                                          | This lab     |
| pCX41                                                                              | 18,643 bp, <i>rdpABC</i> gene cluster from <i>X. nematophila</i> ATCC 19601 genomic DNA assembled into pCOLA-ara-tacI, Km <sup>R</sup>                                       | <sup>3</sup> |
| pCX47                                                                              | 7,577 bp, <i>rdpD</i> from <i>X. nematophila</i> ATCC 19601 genome assembled into pCDF-ara-tacI, Sm <sup>R</sup>                                                             | This study   |
| pCX4                                                                               | 16,048 bp, <i>Pb62AB</i> from <i>Xenorhabdus</i> PB62.4 genome assembled into pCOLA-ara-tacI, Km <sup>R</sup>                                                                | This study   |
| pCX34                                                                              | 7,464 bp, <i>pb62A</i> from <i>Xenorhabdus</i> PB62.4 genome assembled into pCOLA-ara-tacI, Km <sup>R</sup>                                                                  | This study   |
| pCX35                                                                              | 9,424 bp, <i>pb62B</i> from <i>Xenorhabdus</i> PB62.4 genome assembled into pCDF-ara-tacI, Sm <sup>R</sup>                                                                   | This study   |
| pCX55                                                                              | 9,368 bp, <i>xndB</i> from <i>xnd</i> gene cluster, assembled into pCDF-ara-tacI, Sm <sup>R</sup>                                                                            | <sup>3</sup> |
| pCX68                                                                              | 7,407 bp, Ser in the conserved motif of LGGHSL from PCP domain of <i>Pb62A</i> was replaced by Ala, the encoding sequence was assembled into pCOLA-ara-tacI, Km <sup>R</sup> | This study   |
| Km <sup>R</sup> : kanamycin resistance; Sm <sup>R</sup> : spectinomycin resistance |                                                                                                                                                                              |              |

## Supplementary Figures

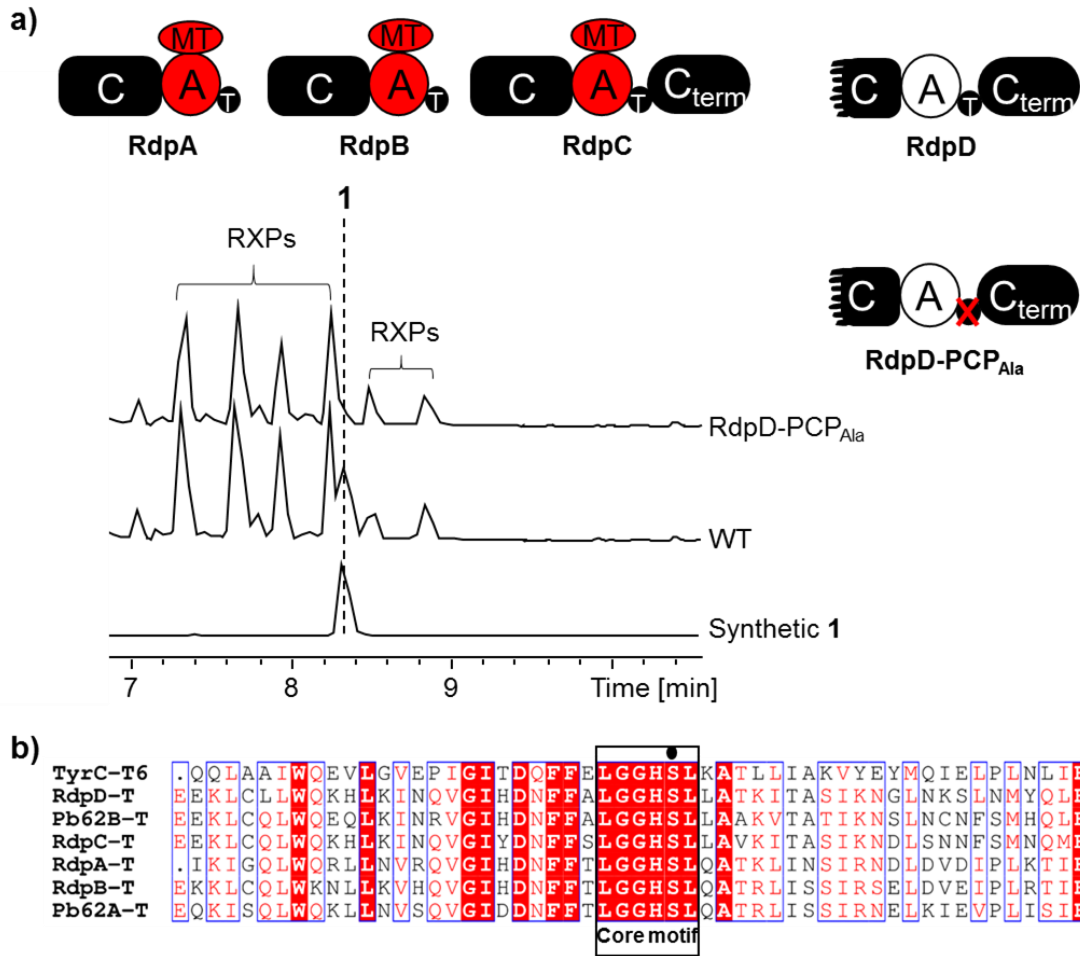

**Figure S1.** Construction of RdpABCD and analysis of RdpD-PCP mutation. a) General compositions of RdpABC, RdpD and RdpD-PCP mutation as well as comparison of BPCs from LC-MS analysis of *X. nematophila* HGB081 (WT), RdpD-PCP mutant and synthetic nematophin (1). b) Alignment of PCP domains from selective NRPSs, the conserved motif of PCP domain was shown, Ser was replaced by Ala to generate RdpD-PCP mutation.

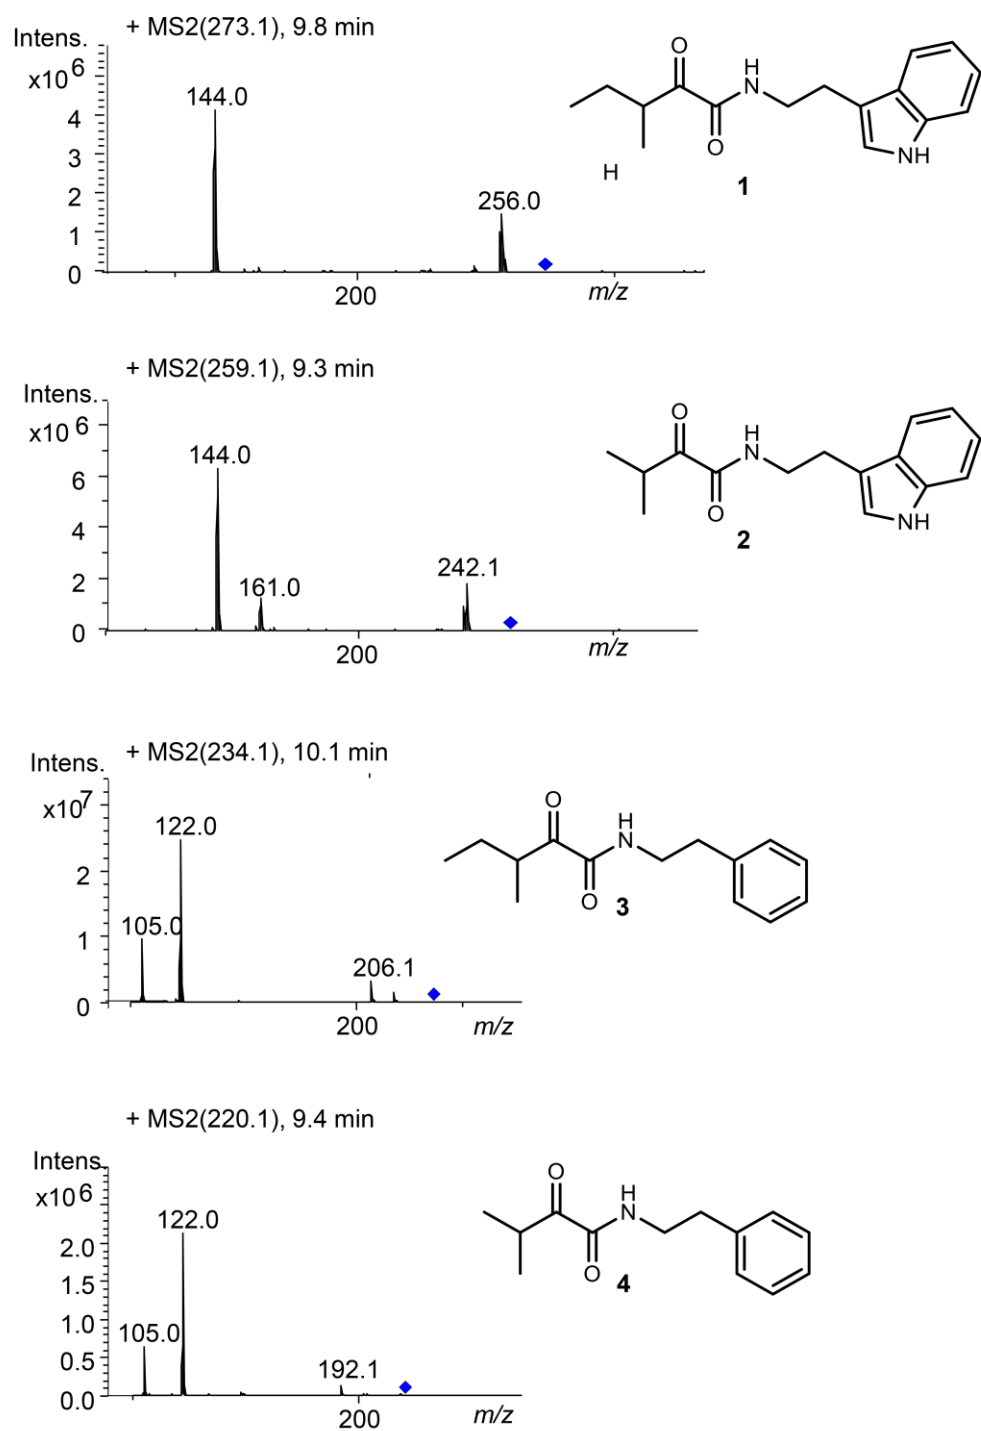

**Figure S2.** LCMS-MS fragmentations of compounds **1-4**.

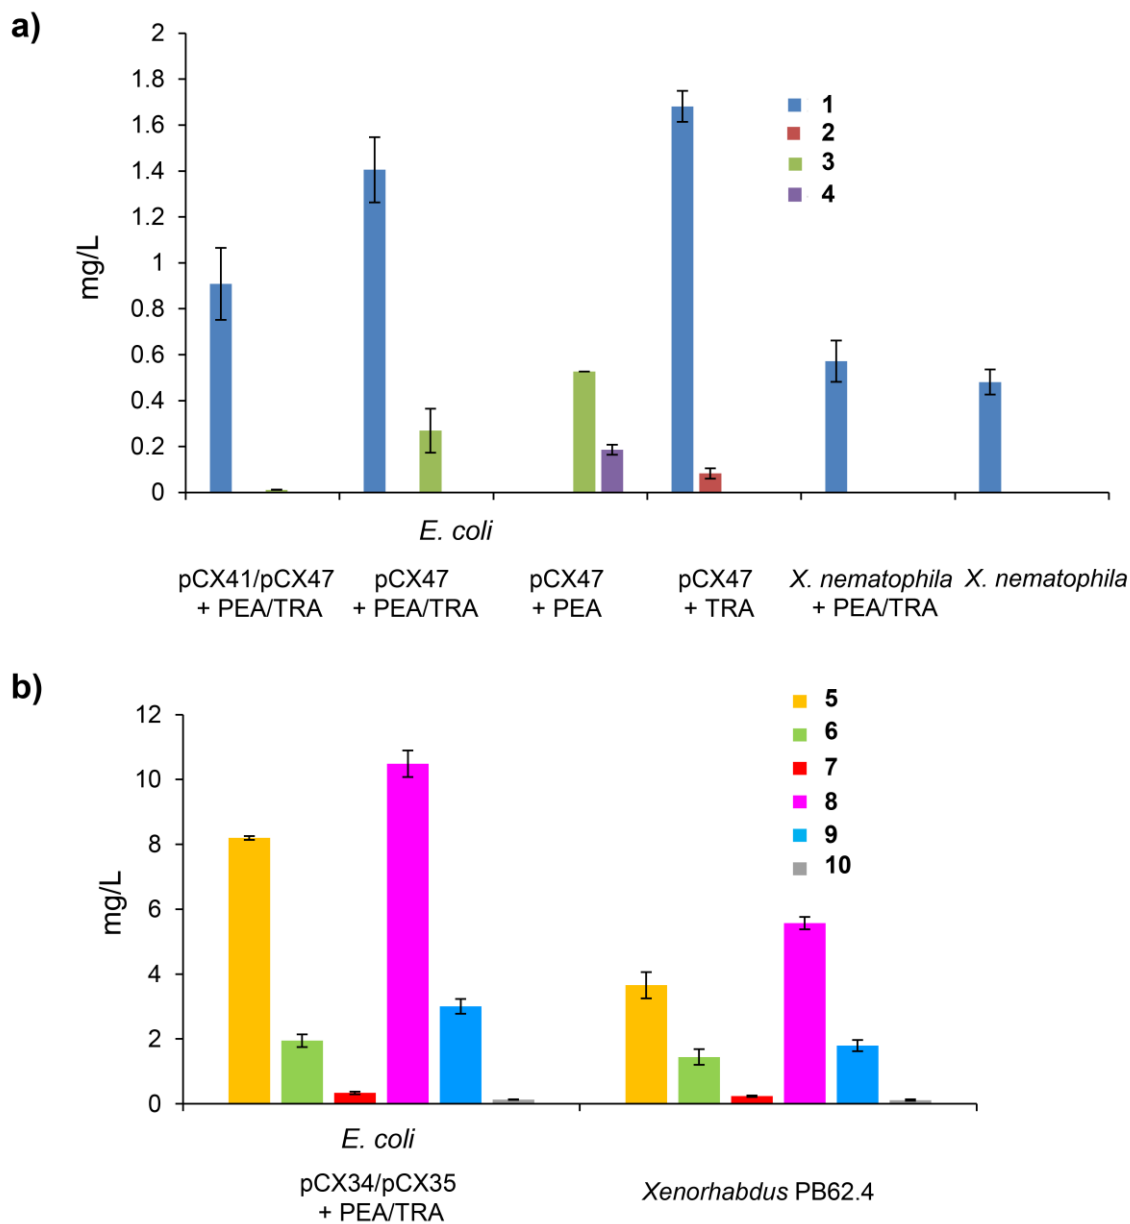

**Figure S3.** Comparison of production titer of compounds **1-10** in original *Xenorhabdus* producers and heterologous expression strains (*E. coli*). a), Quantification of production level for compounds **1-4** produced in both heterologous *E. coli* MtaA strains and *X. nematophila* HGB081 (against **1** as standard); b), Quantification of production level for compounds **5-10** produced in both heterologous *E. coli* MtaA strain and *Xenorhabdus* PB62.4 (WT) (against **8** as standard).

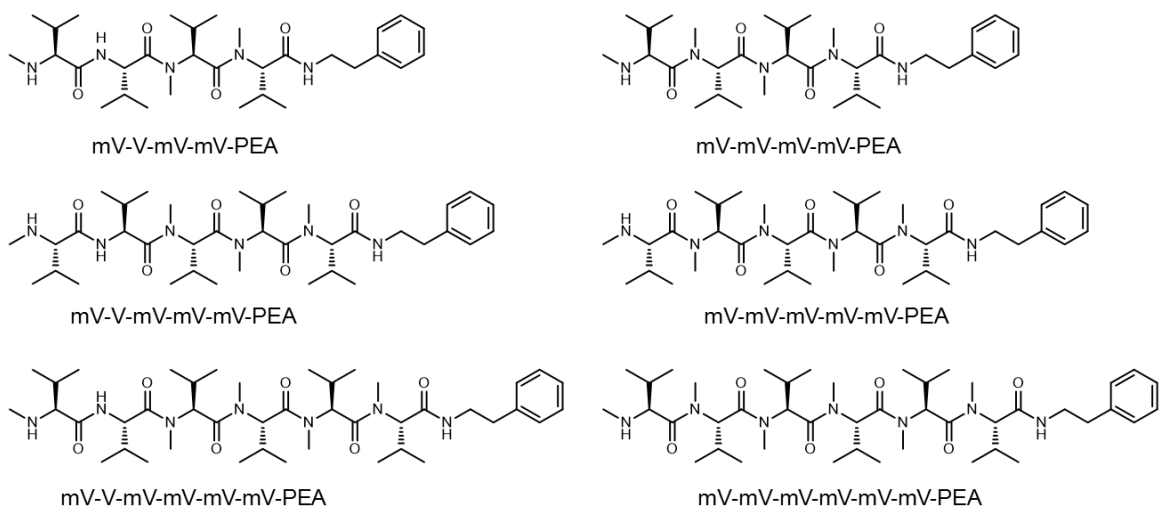

**Figure S4.** Chemical structures of selected rhabdopeptides from *X. nematophila*.<sup>3</sup>



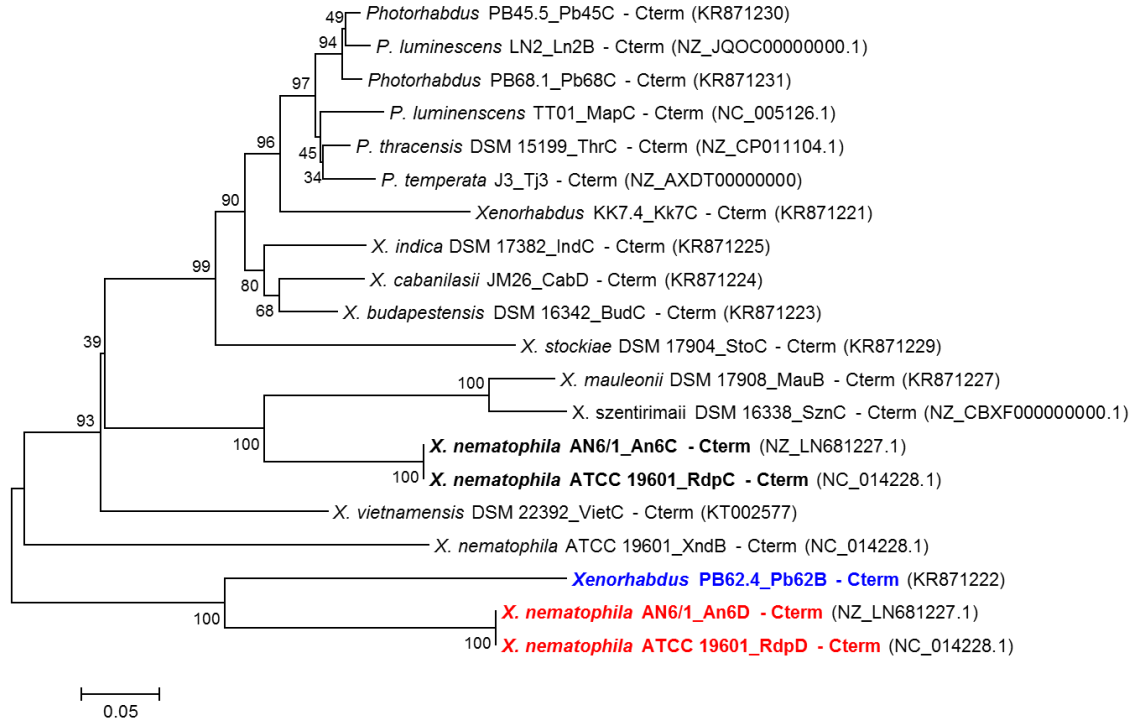

**Figure S5.** RdpD-C<sub>term</sub> represents a distinct subclade in the phylogenetic tree of C<sub>term</sub> domains from selected RXP-NRPSs in different *Xenorhabdus* and *Photorhabdus* strains.<sup>3</sup>

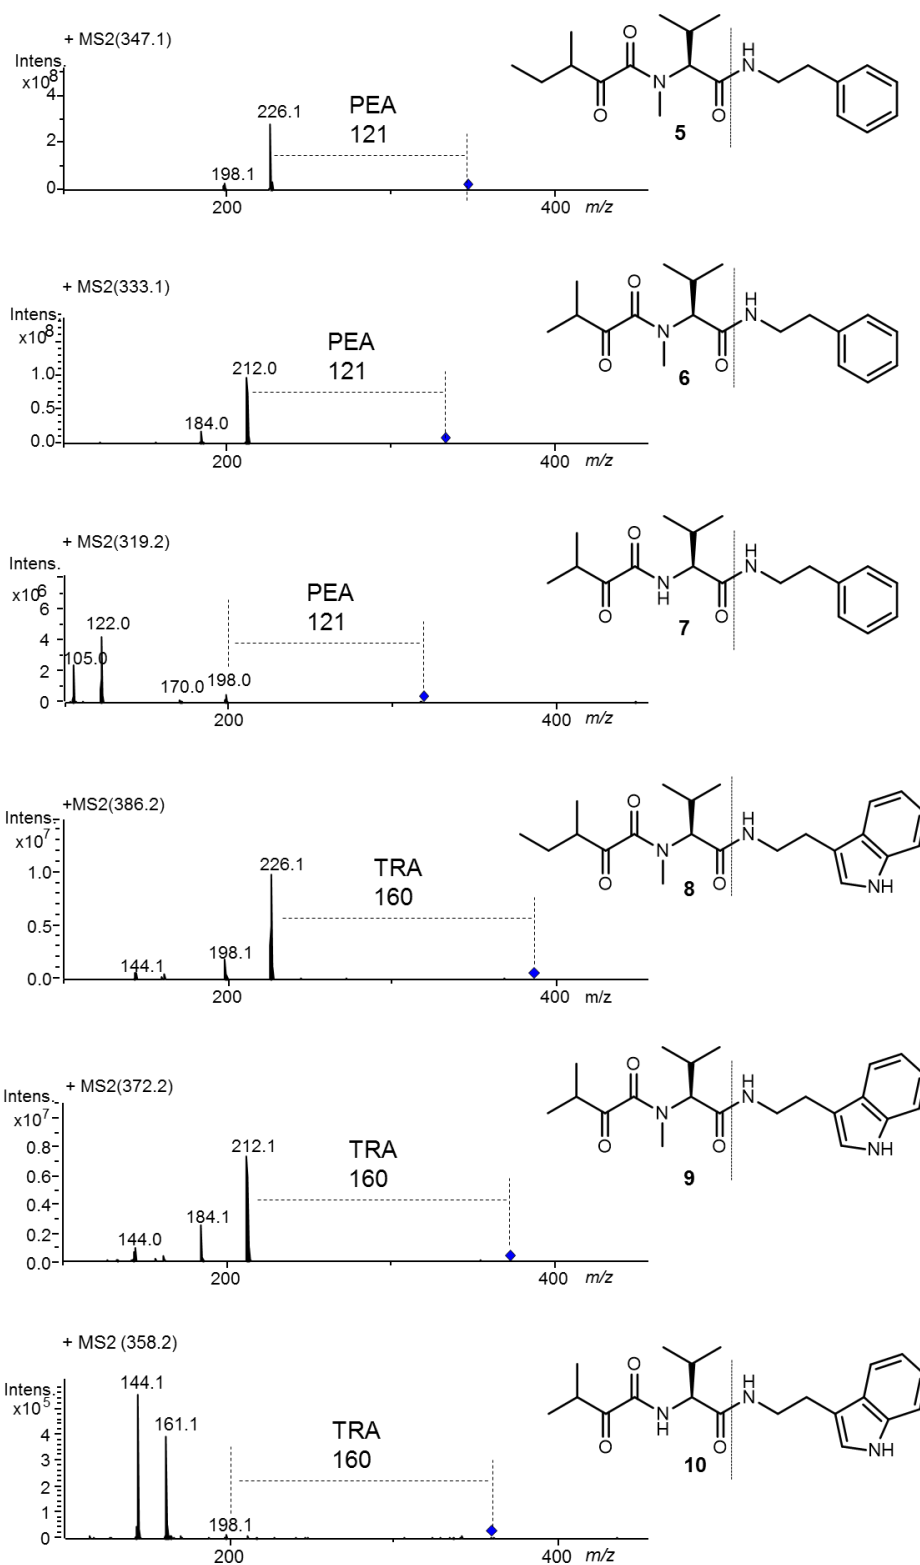

**Figure S6.** LCMS-MS fragmentation of nevaltophins A-F (5-10).

a)  $m/z$   $[M+H]^+$ : 347.2

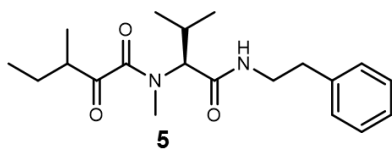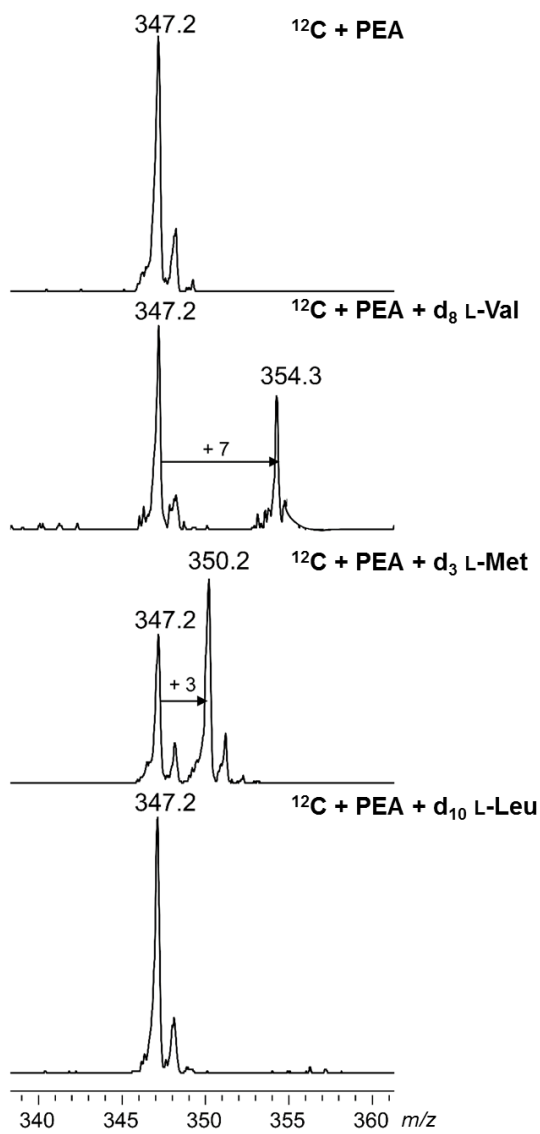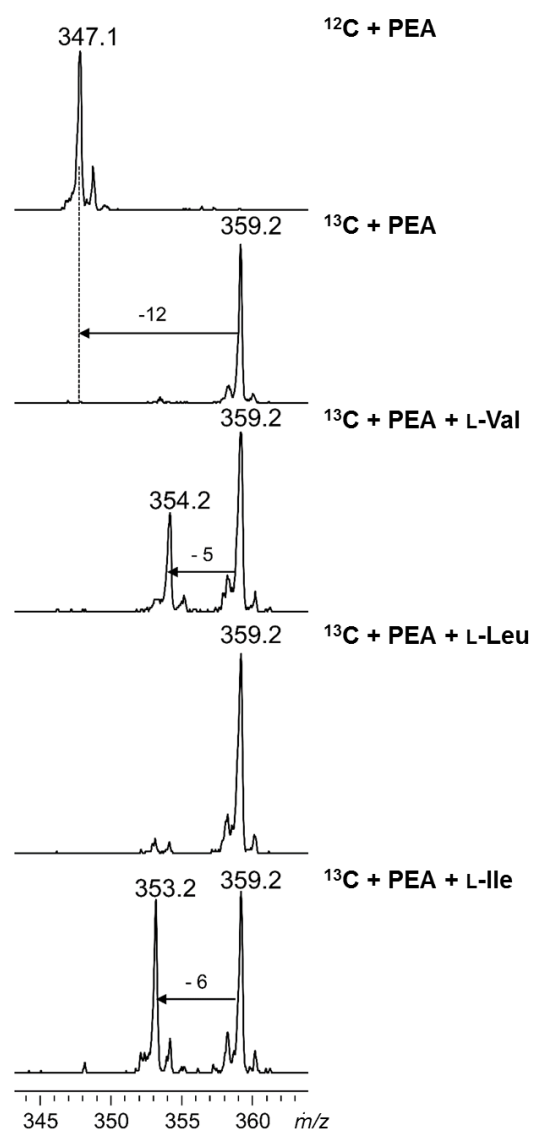

b)  $m/z$   $[M+H]^+$ : 333.2

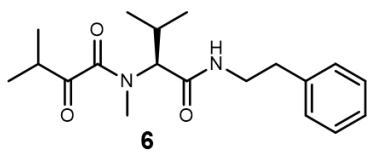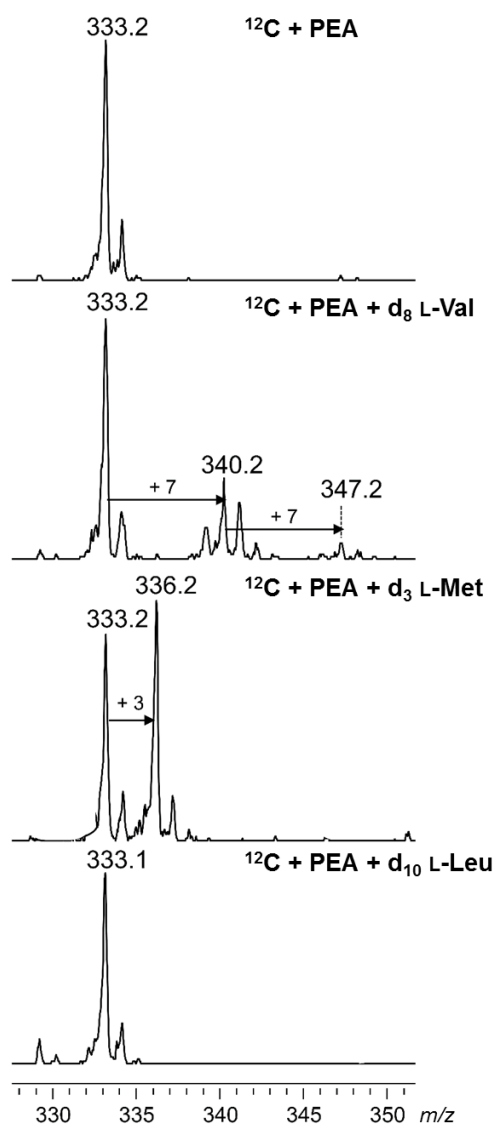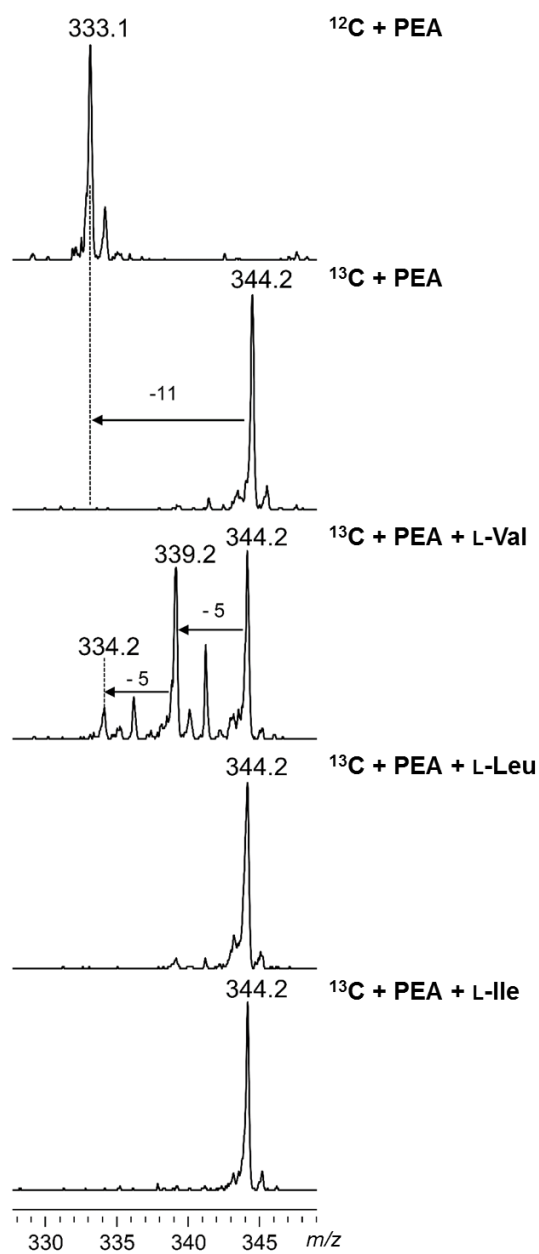

c)  $m/z$   $[M+H]^+$ : 319.2

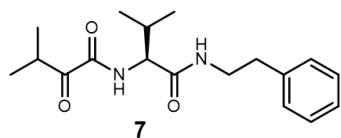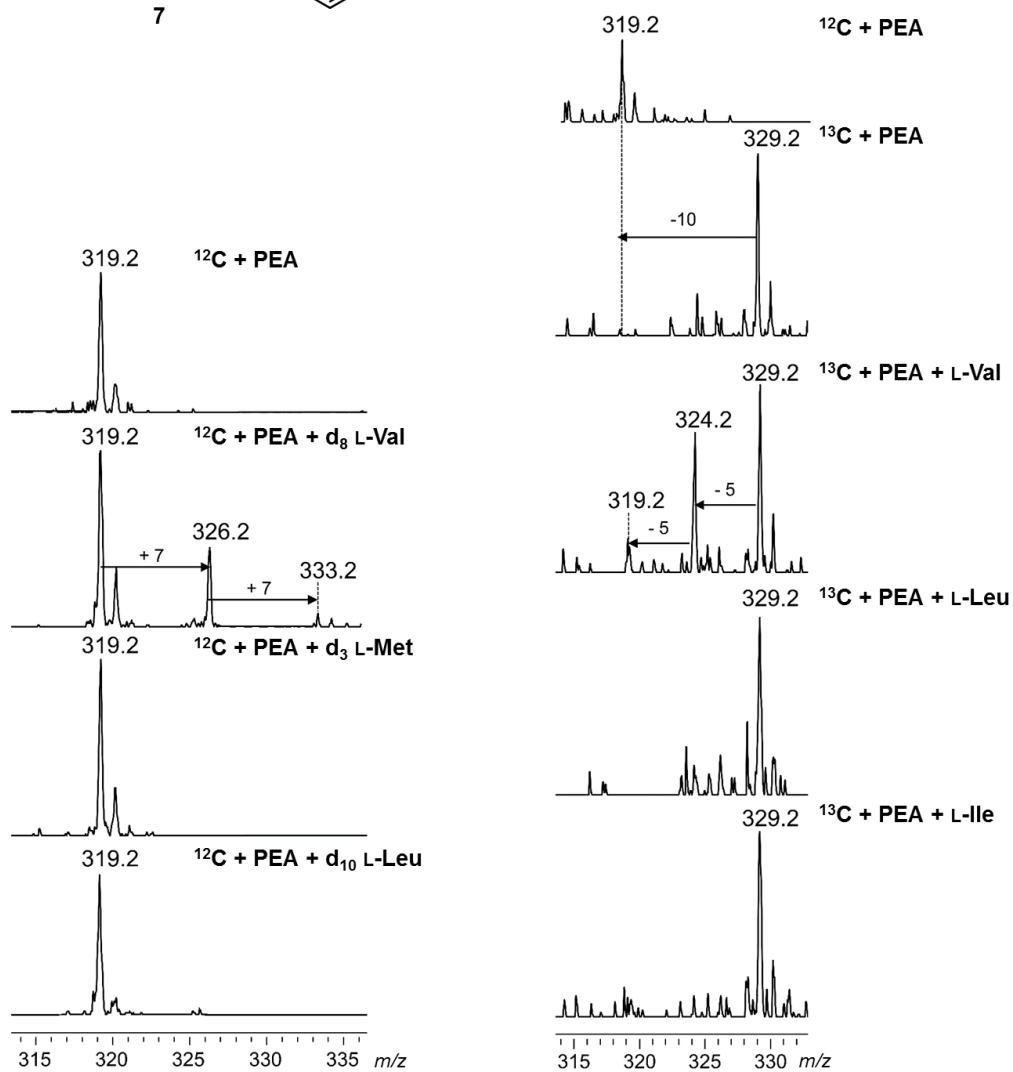

**Figure S7.** EICs of LC-MS analysis of crude extracts from isotope labeling experiments for determination of compounds **5-7**.

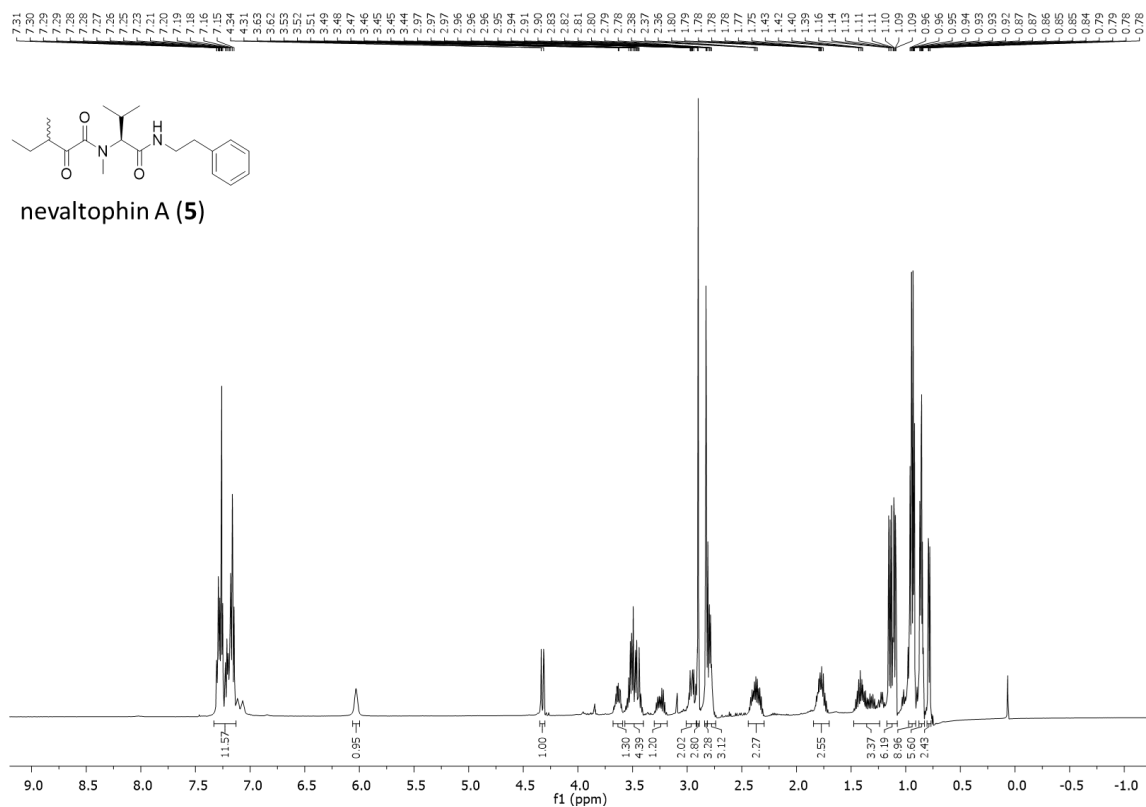

**Figure S8.** <sup>1</sup>H NMR spectrum of **5** (CDCl<sub>3</sub>, 500 MHz).

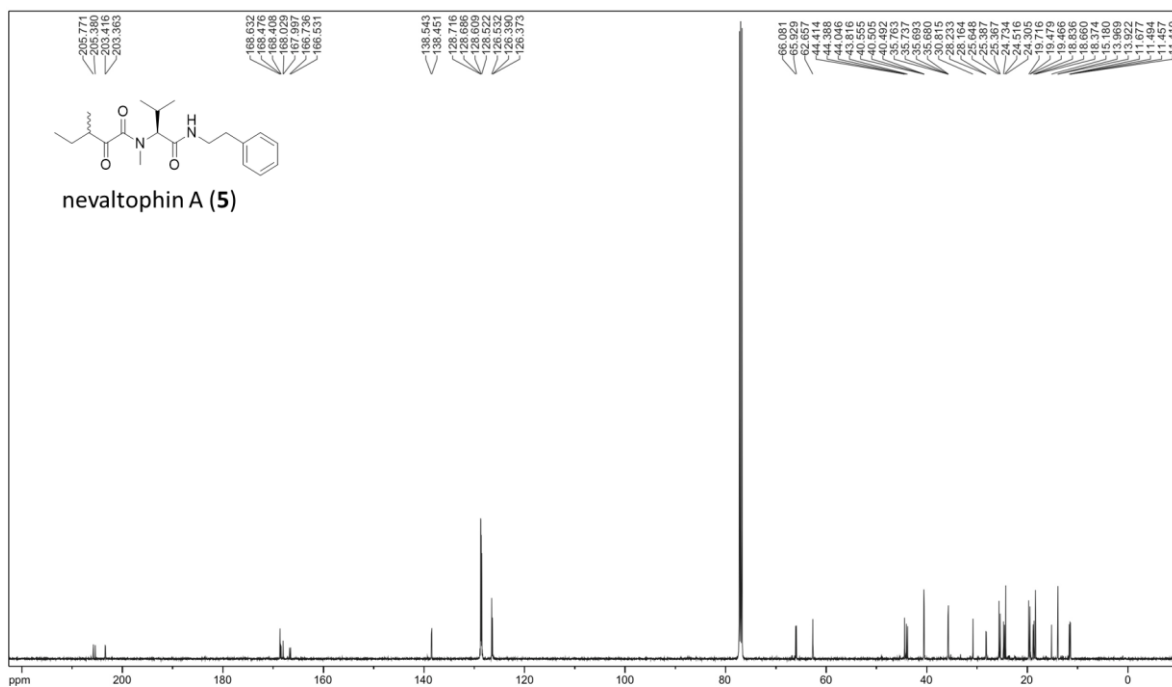

C

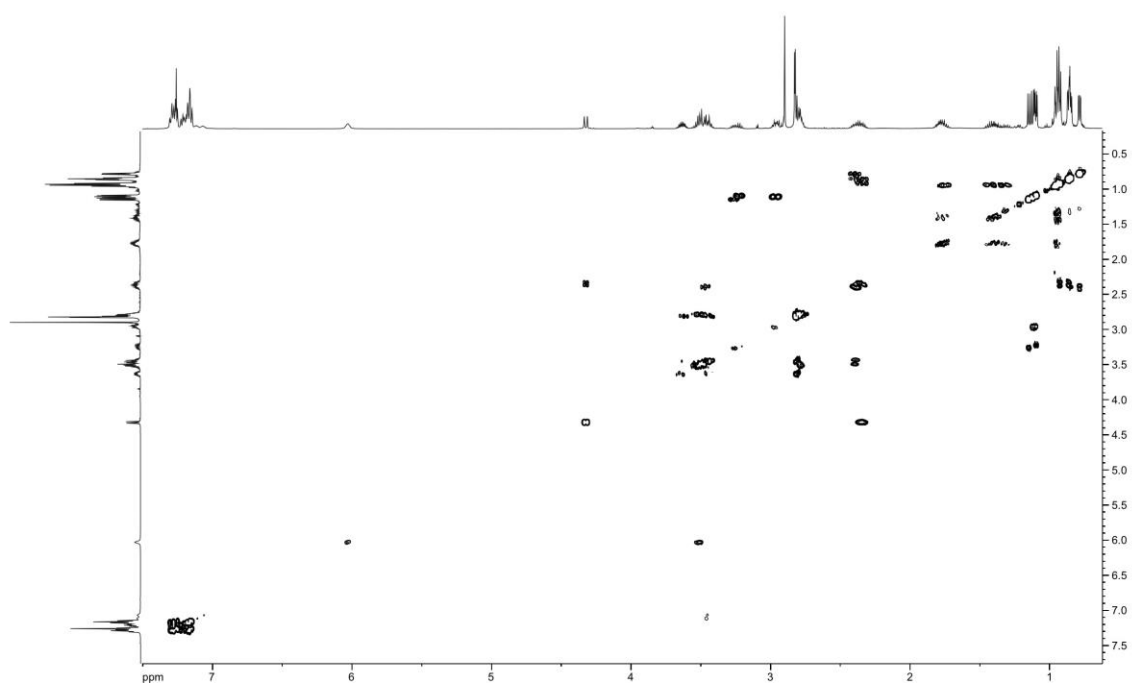

**Figure S10.** COSY spectrum of **5** ( $\text{CDCl}_3$ , 500 MHz).

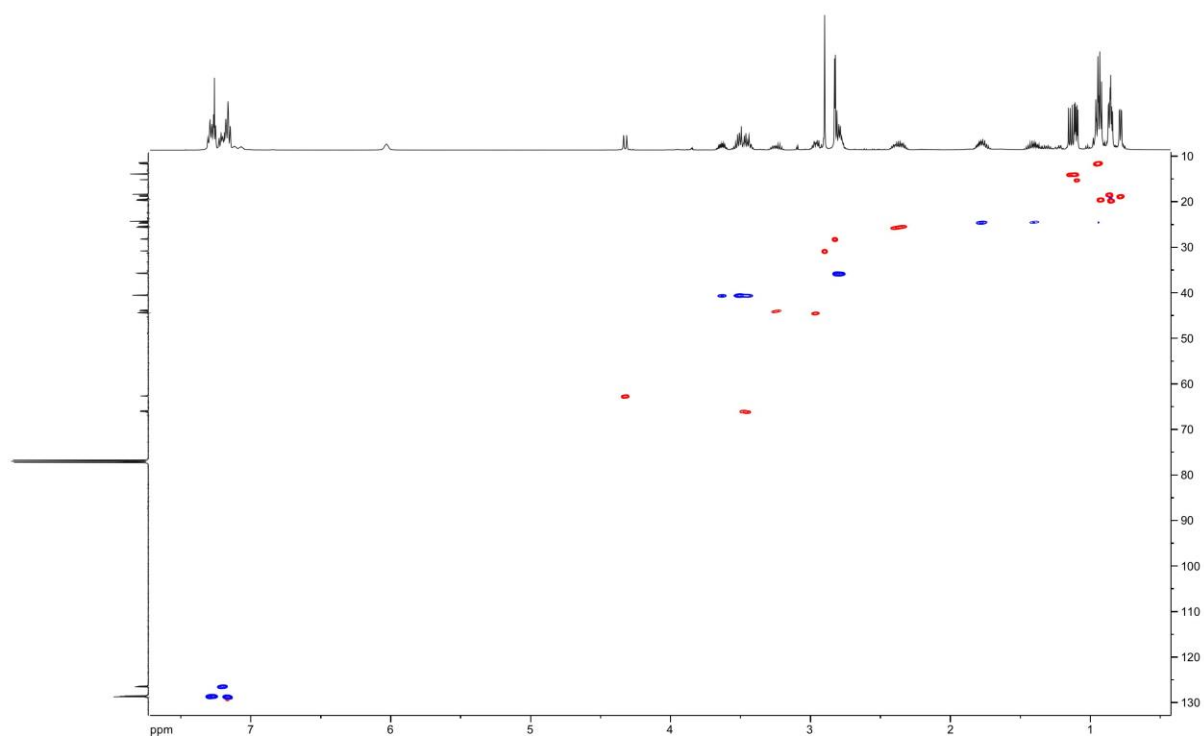

**Figure S11.** HSQC spectrum of **5** ( $\text{CDCl}_3$ , 500 MHz).

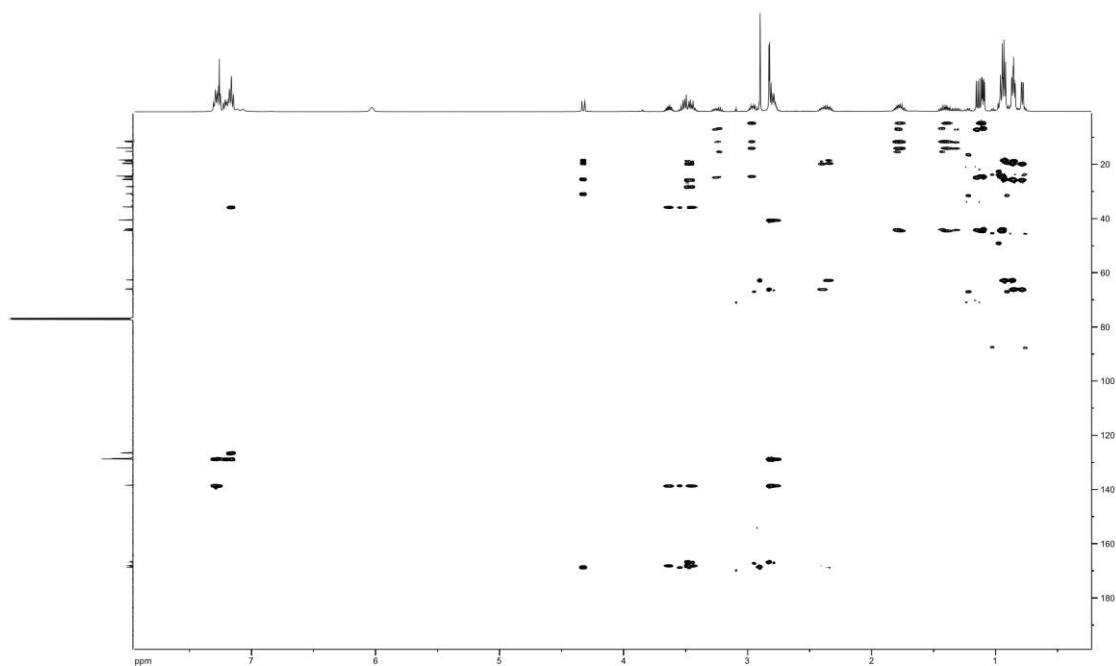

**Figure S12.** HMBC spectrum of **5** (CDCl<sub>3</sub>, 500 MHz).



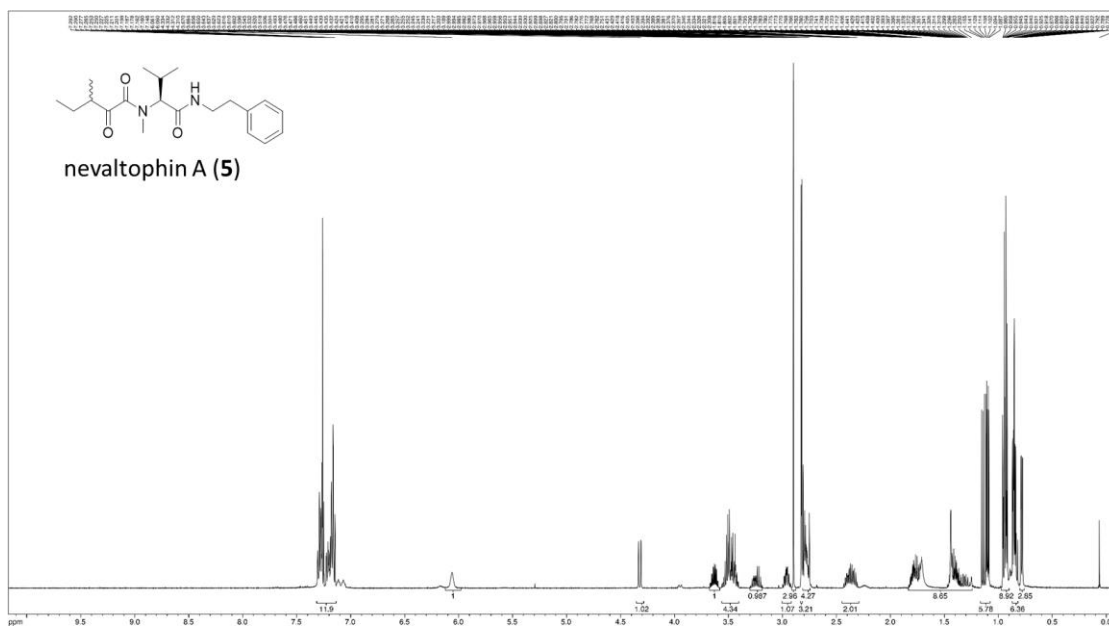

**Figure S13.**  $^1\text{H}$  NMR spectrum of synthetic **5** ( $\text{CDCl}_3$ , 500 MHz).

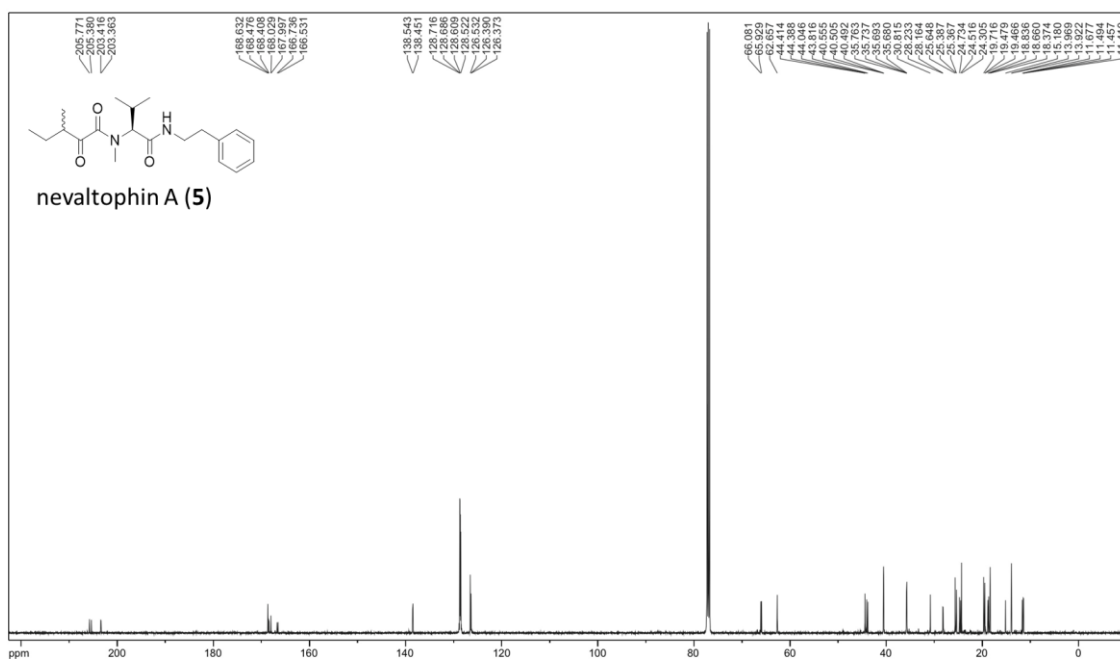

**Figure S14.**  $^{13}\text{C}$  NMR spectrum of synthetic **5** ( $\text{CDCl}_3$ , 125 MHz).



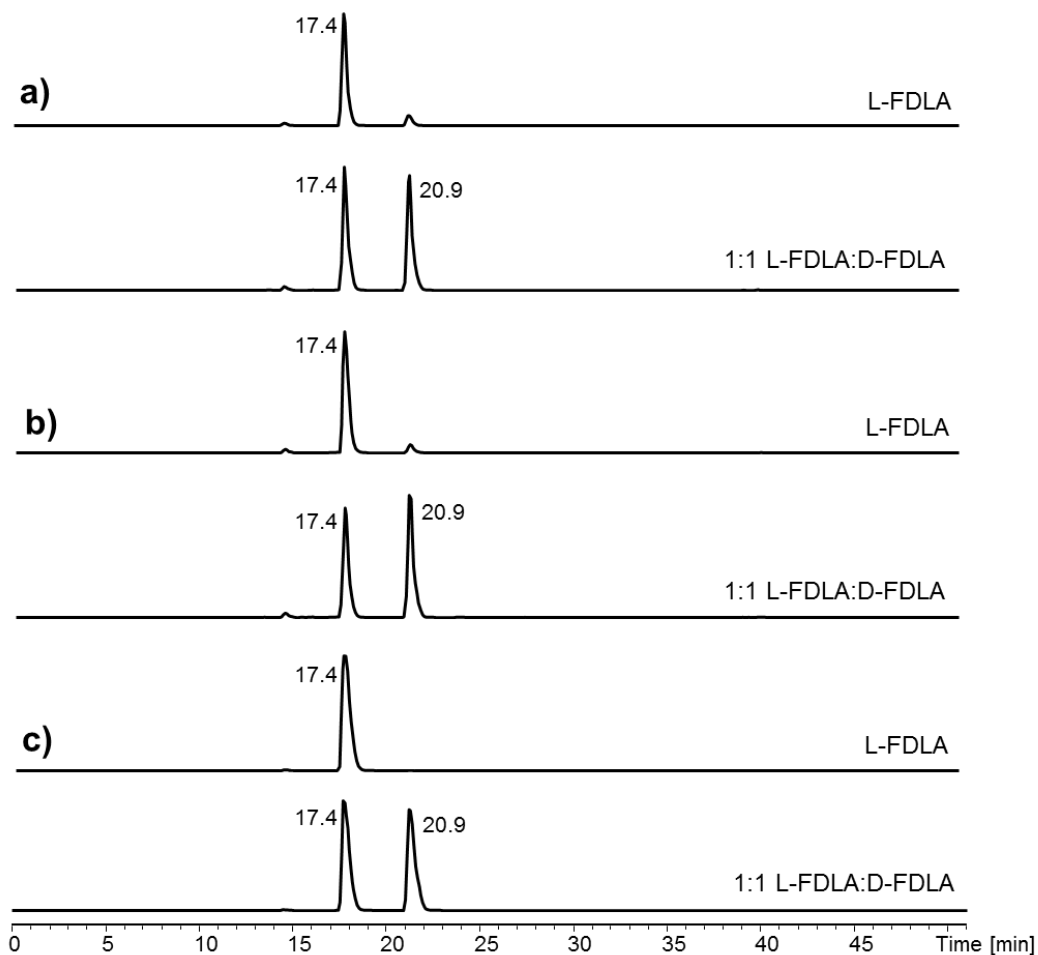

**Figure S17.** Determination of amino acid absolute configuration via the advanced Marfey's method.<sup>8</sup> Extracted ion chromatograms ( $m/z$  426,  $[M + H]^+$ ) are shown for hydrolysed and derivatised synthetic **5** (a), natural **5** (b), and authentic *N*-Me-L-Val (c). Retention times are shown in min. L-FDLA: *N* $\alpha$ -(5-fluoro-2,4-dinitrophenyl)-L-leucinamide. D-FDLA: *N* $\alpha$ -(5-fluoro-2,4-dinitrophenyl)-D-leucinamide.

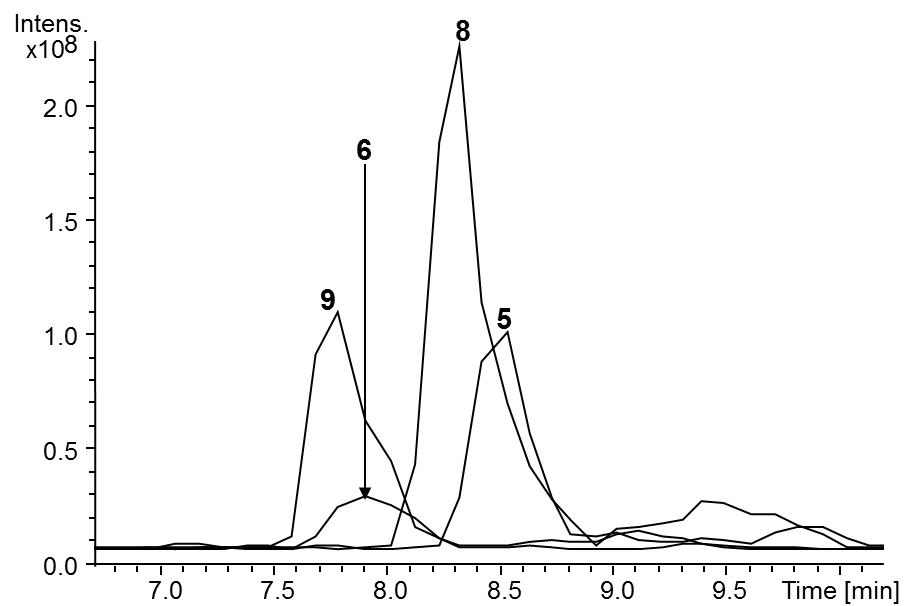

**Figure S18.** EICs of compounds **5**, **6**, **8** and **9** produced in wild type strain *Xenorhabdus* PB62.4.

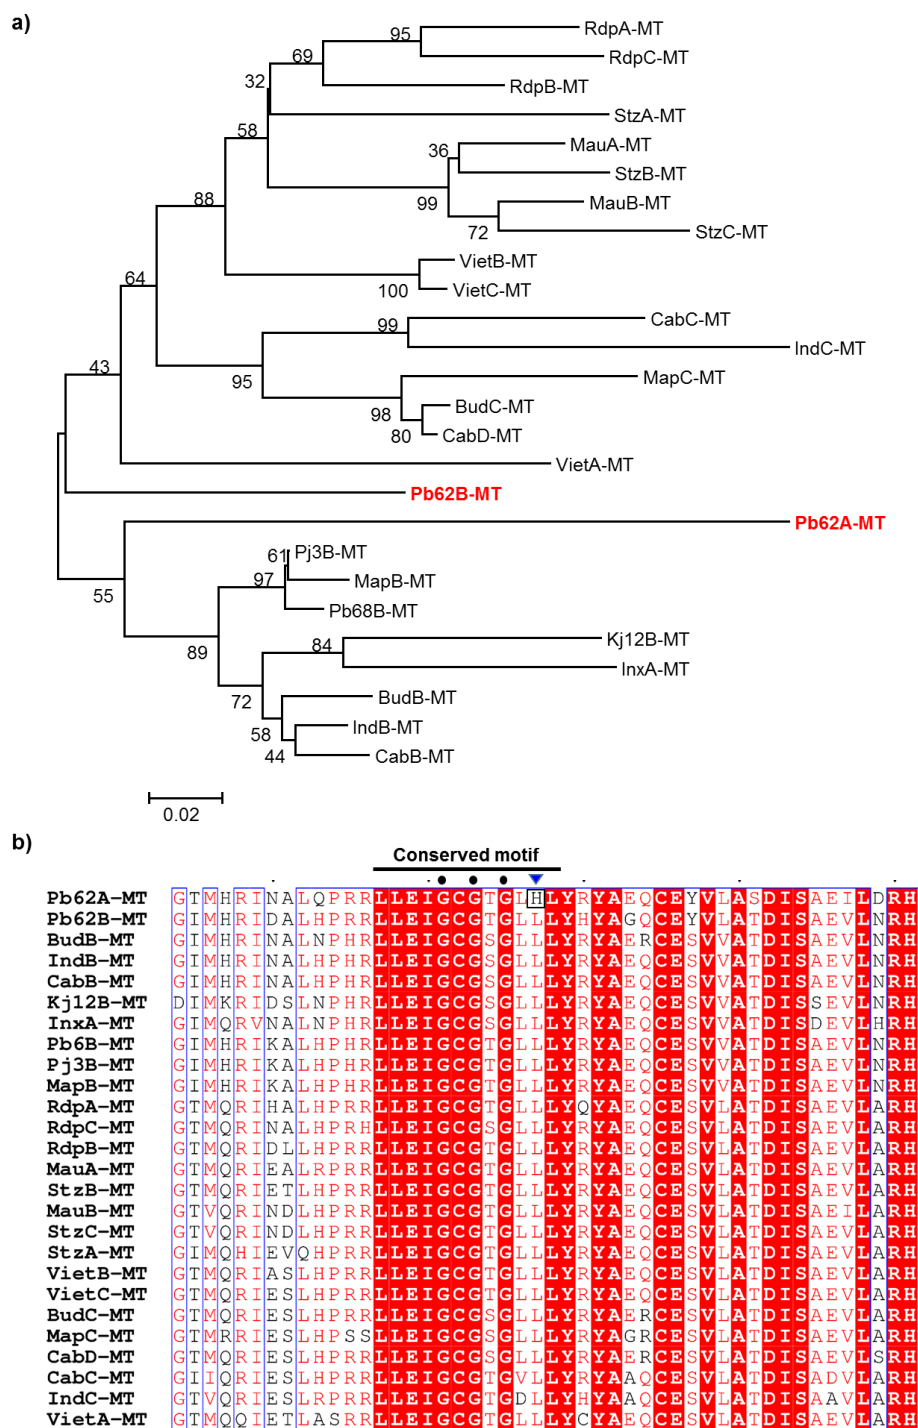

**Figure S19.** Comparative analysis of Pb62A-MT domain to the other RXP-NRPS-MT domains. a) Phylogenetic tree of MT domains from selected RXP-NRPSs. Pb62A-MT domain represents a distinct subclade. b) Alignment of MT domains from selected RXP-NRPSs, the conserved motif of LLEIGCT/SGLL was shown. In the core motif of Pb62A-MT, one L is replaced by H.

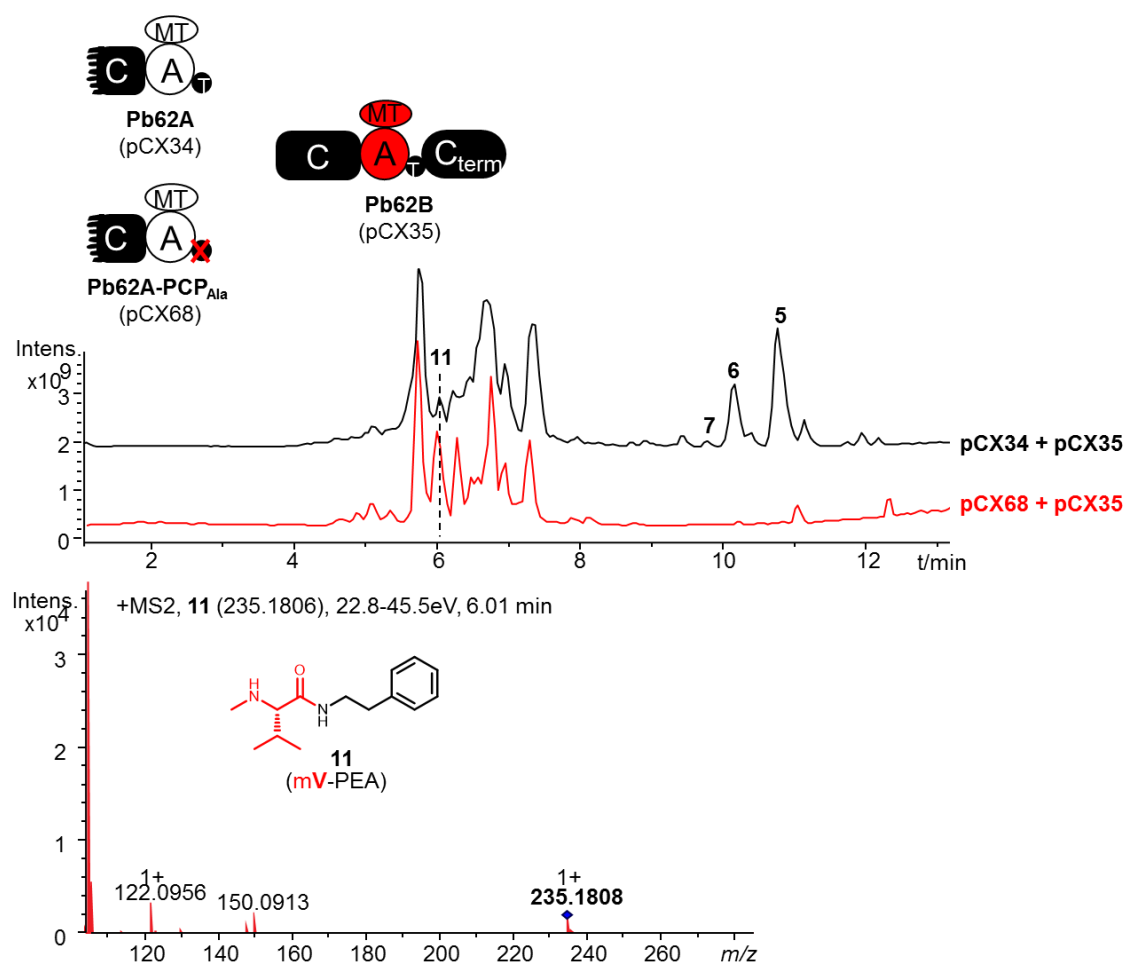

**Figure S20.** Comparison of BPCs from HR-EIS-HPLC-MS analysis for coexpressions of pCX34 (Pb62A) and pCX35 (Pb62B) (black) as well as pCX68 (Pb62A with point mutation on PCP domain) and pCX35 (red). The point mutation on T domain in Pb62A led to no production of nematophin derivatives but accumulation of compound 11.

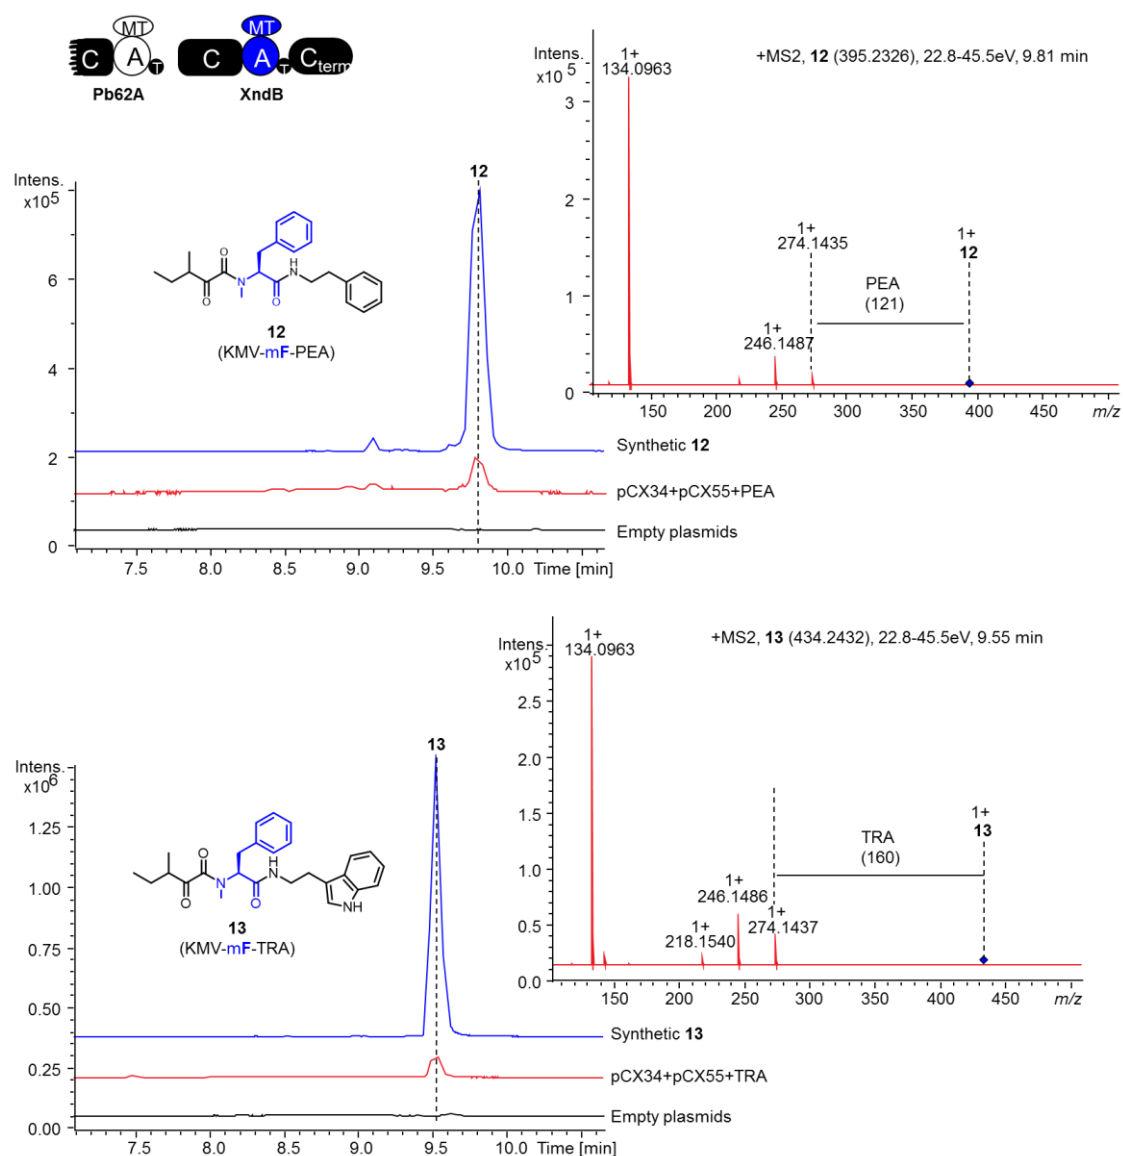

**Figure S21.** HR-EIS-HPLC-MS analysis for coexpression of Pb62A and XndB after feeding with PEA and TRA, respectively as well as expression of empty plasmids as a negative control. Comparisons of EICs and MS2 fragmentations for compounds **12** and **13** were shown. Synthetic compounds **12** and **13** were used as positive controls.

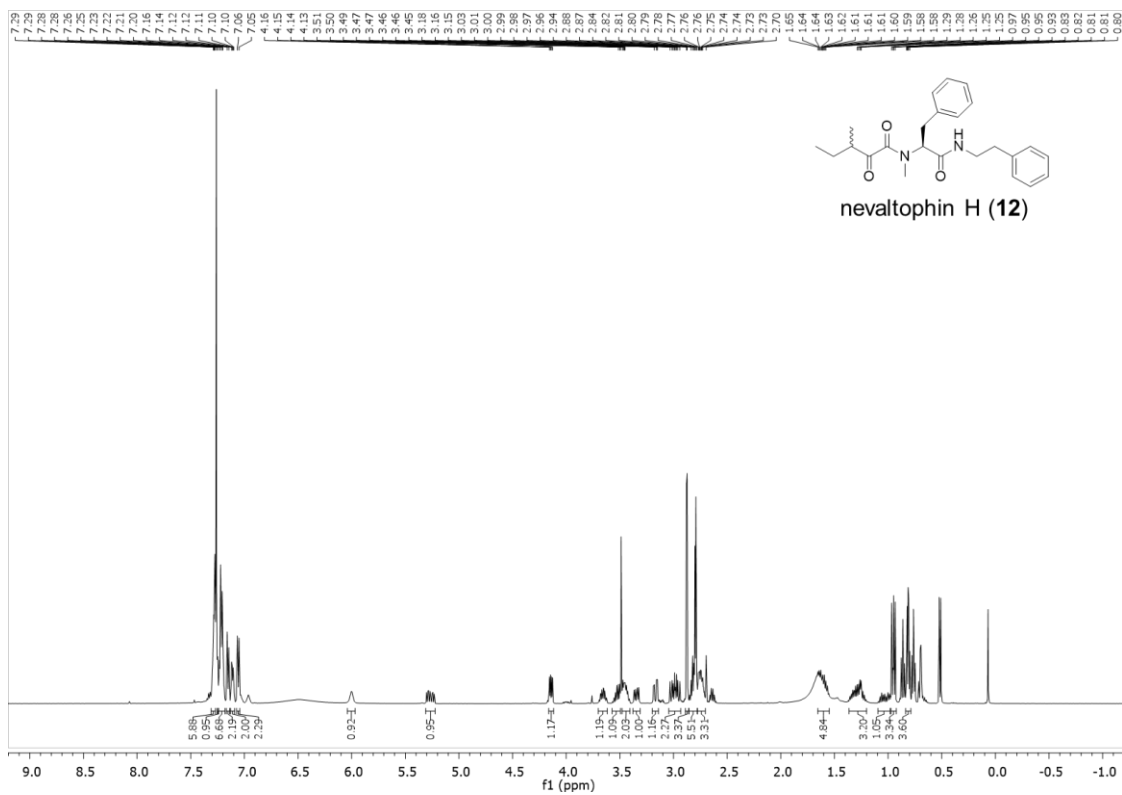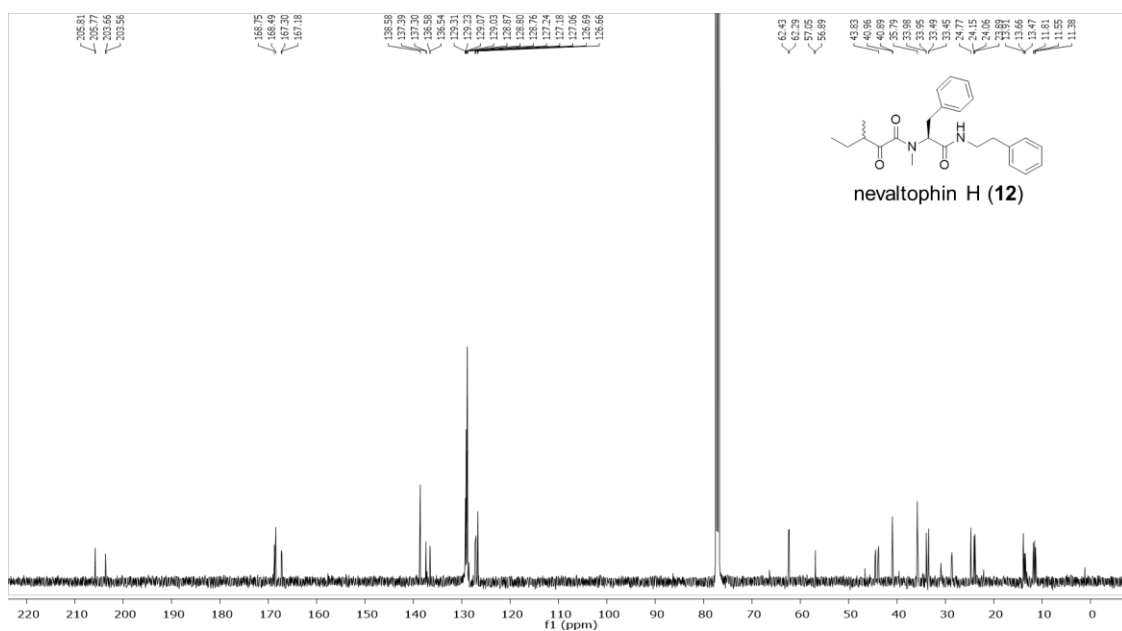



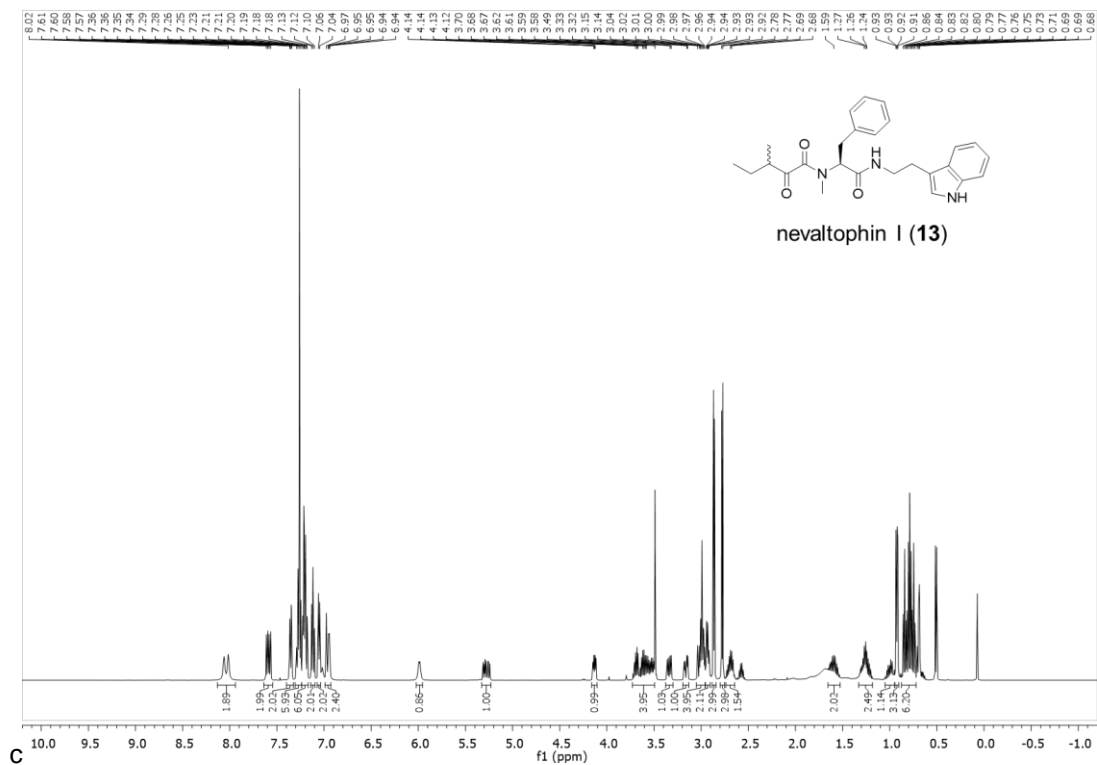

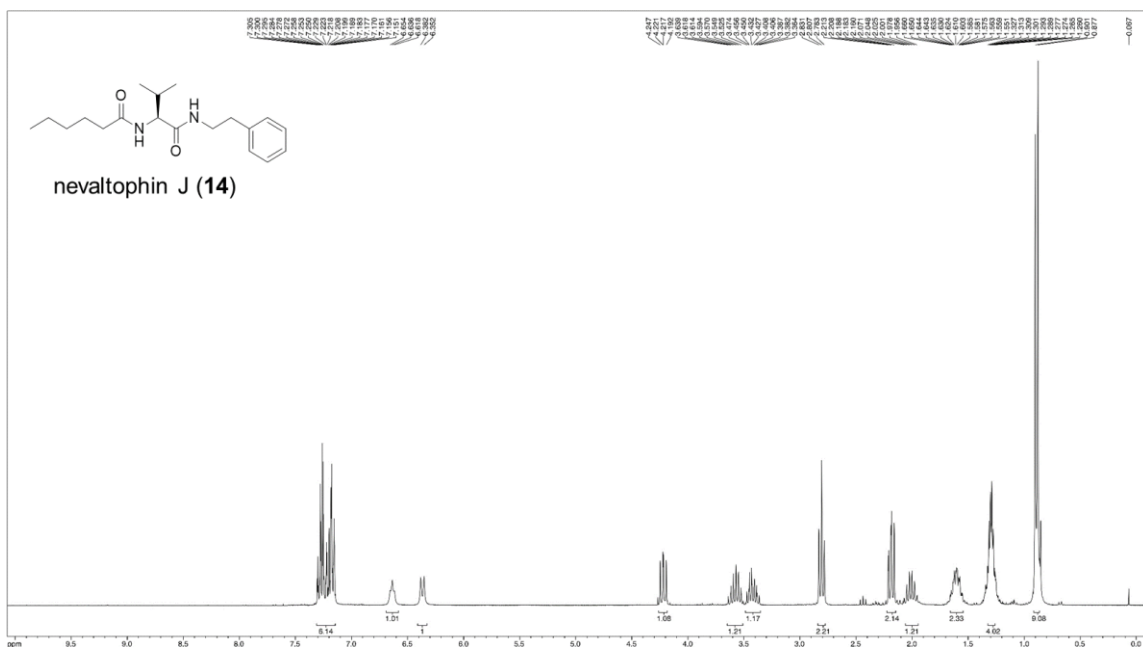

**Figure S26.** <sup>1</sup>H NMR spectrum of synthetic **14** (CDCl<sub>3</sub>, 300 MHz).

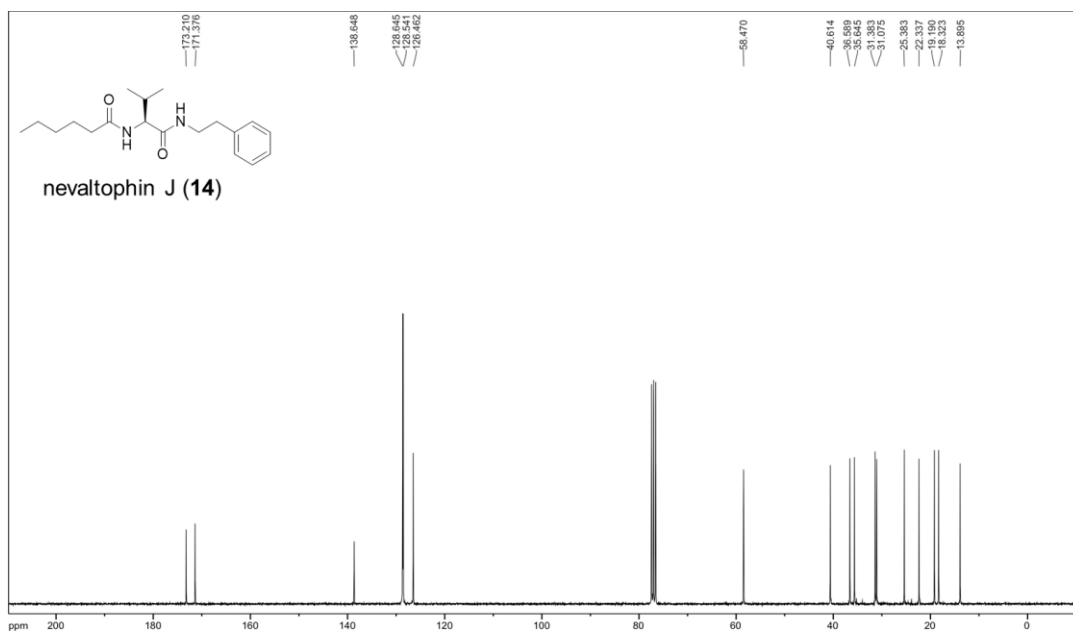

**Figure S27.** <sup>13</sup>C NMR spectrum of synthetic **14** (CDCl<sub>3</sub>, 75 MHz).

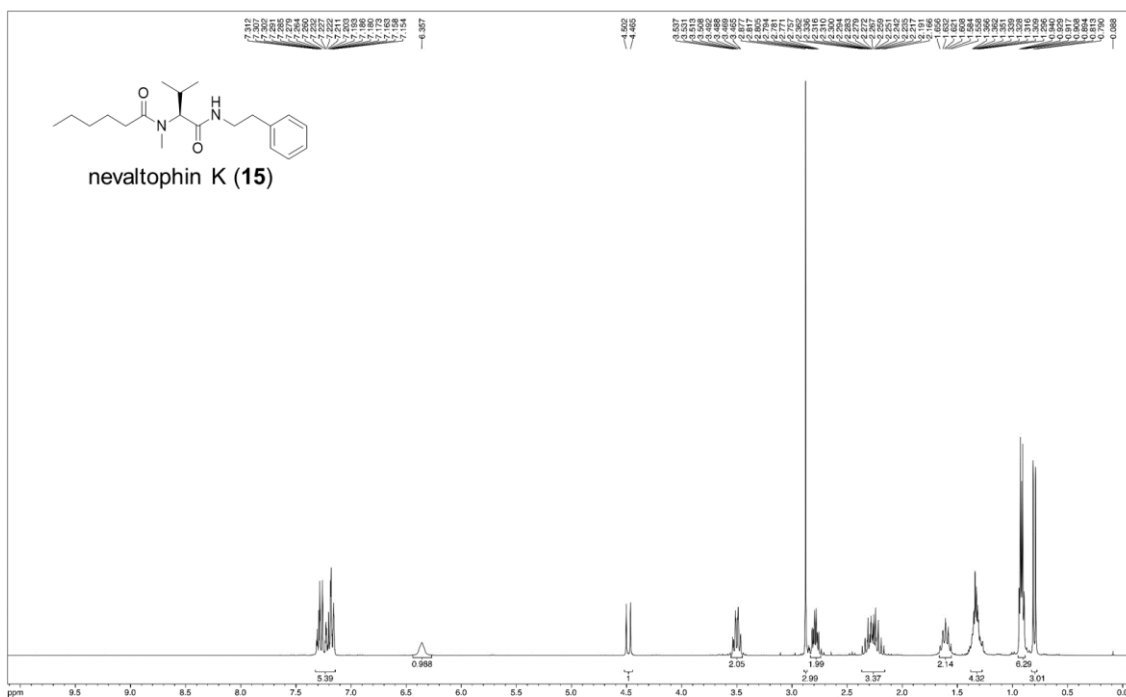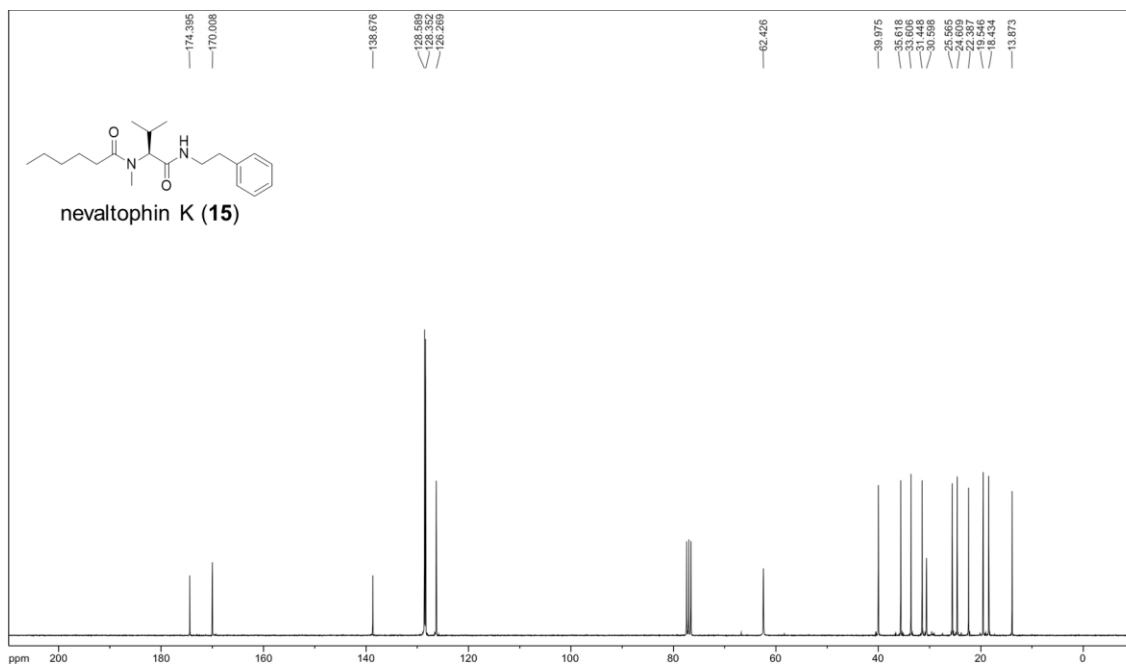

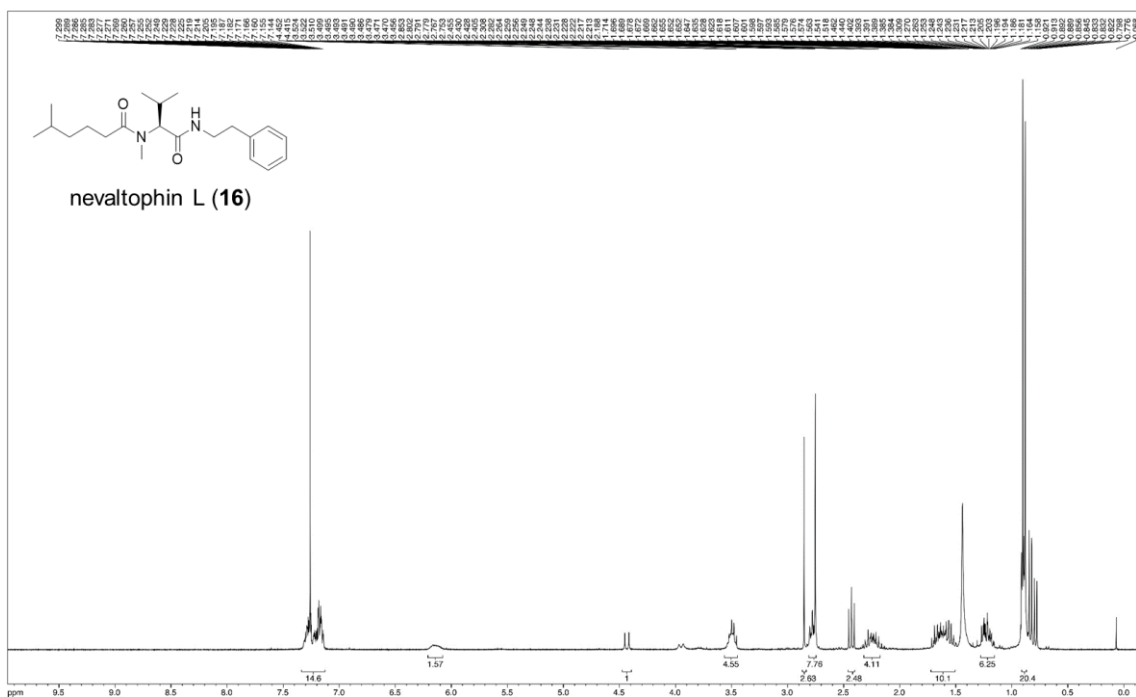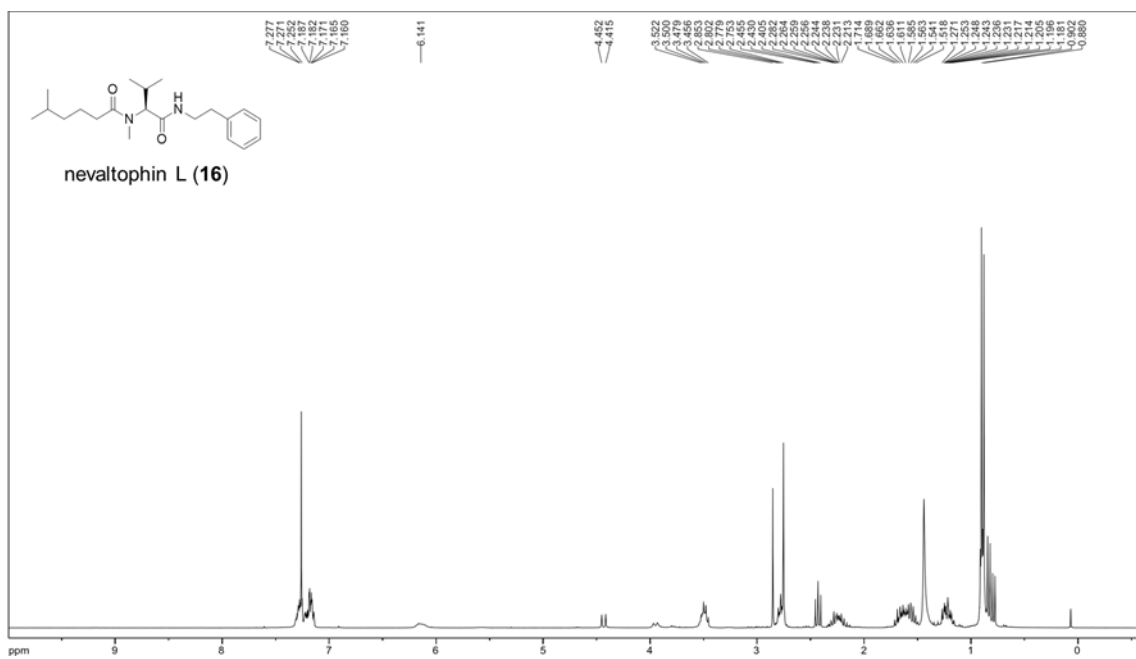

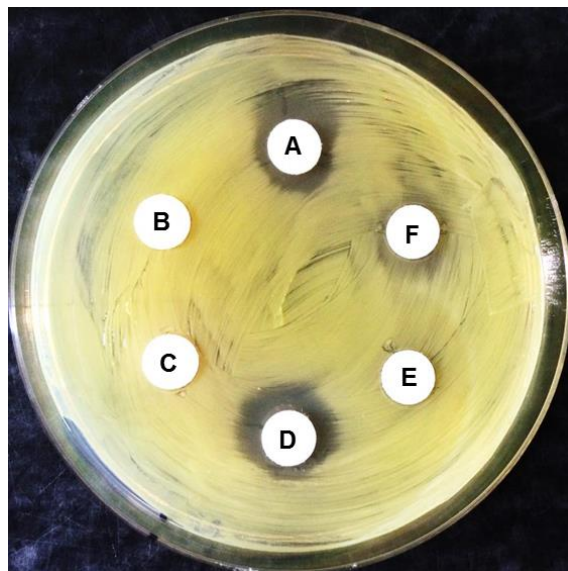

**Figure S32.** Bioactivity assay of nematophin and nevaltophins against Gram-positive *Micrococcus luteus*. **A**, synthetic nematophin (**1**); **B**, nevaltophins A-C (**5-7**) (crude extracts from LB culture of *E. coli* strains carrying *pb62* gene cluster fed with PEA); **C**, nevaltophins D-F (**8-10**) (crude extracts from LB culture of *E. coli* strains carrying *pb62* gene cluster fed with TRA); **D**, compounds **1** and **2** (crude extracts from LB culture of *E. coli* carrying *rdpD* fed with TRA); **E**, compounds **3** and **4** (crude extracts from LB culture of *E. coli* carrying *rdpD* fed with PEA); **F**, RDPs and compounds **3-4** RdpABC + RdpD + TRA (crude extracts from LB culture of *E. coli* carrying *rdpABC* gene cluster and *rdpD* fed with TRA). Synthetic nematophin (**1**) was applied as a pure compound (50 µg), while **B-F** were used as crude culture extracts (0.6 mg).

#### Rhabduscin gene clusters:

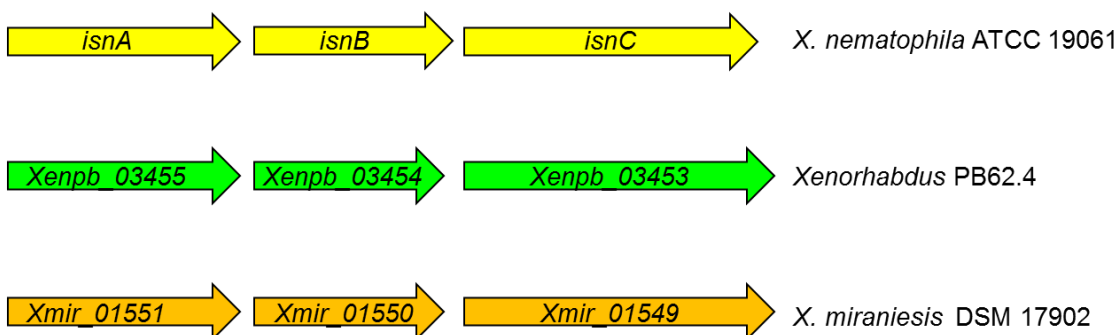

**Figure S33.** Rhabduscin biosynthetic gene clusters found in *Xenorhabdus* PB62.4 and *X. miraniensis* DSM 17902 strains.

## References

- (1) Sambrook, J.; Russel, D. W. *Molecular Cloning: A Laboratory Manual*. 4th ed. Cold Spring Harbor, **2001**.
- (2) Reimer, D.; Cowles, K. N.; Proschak, A.; Nollmann, F. I.; Dowling, A. J.; Kaiser, M.; ffrench-Constant, R.; Goodrich-Blair, H.; Bode, H. B. *Chembiochem* **2013**, *14*, 1991-1997.
- (3) Cai, X.; Nowak, S.; Wesche, F.; Bischoff, I.; Kaiser, M.; Fürst, R.; Bode, H. B. *Nat. Chem.* **2016**. doi:10.1038/nchem.2671.
- (4) Bode, H. B.; Reimer, D.; Fuchs, S. W.; Kirchner, F.; Dauth, C.; Kegler, C.; Lorenzen, W.; Brachmann, A. O.; Gruen, P. *Chem. Eur. J.* **2012**, *18*, 2342-2348.
- (5) Orhan, I.; Sener, B.; Kaiser, M.; Brun, R.; Tasdemir, D. *Mar. Drugs* **2010**, *8*, 47-58.
- (6) Nollmann, F. I.; Dowling, A.; Kaiser, M.; Deckmann, K.; Grosch, S.; Ffrench-Constant, R.; Bode, H. B. *Beilstein J. Org. Chem.* **2012**, *8*, 528-533.
- (7) Crawford, J. M.; Portmann, C.; Zhang, X.; Roeffaers, M. B. J.; Clardy, J. *Proc. Natl. Acad. Sci. USA* **2012**, *109*, 10821-10826.
- (8) Bhushan, R.; Bruckner, H. *J. Chromatogr.* **2011**, *B879*, 3148-3161.
